# Supplementary figures and images for: DNA Methylation Expression Profile of Blood Heat Syndrome and Blood Stasis Syndrome in TCM Psoriasis
Source: Hindawi journal article supplement (doi:10.1155/2022/9343285), 2022-09-19

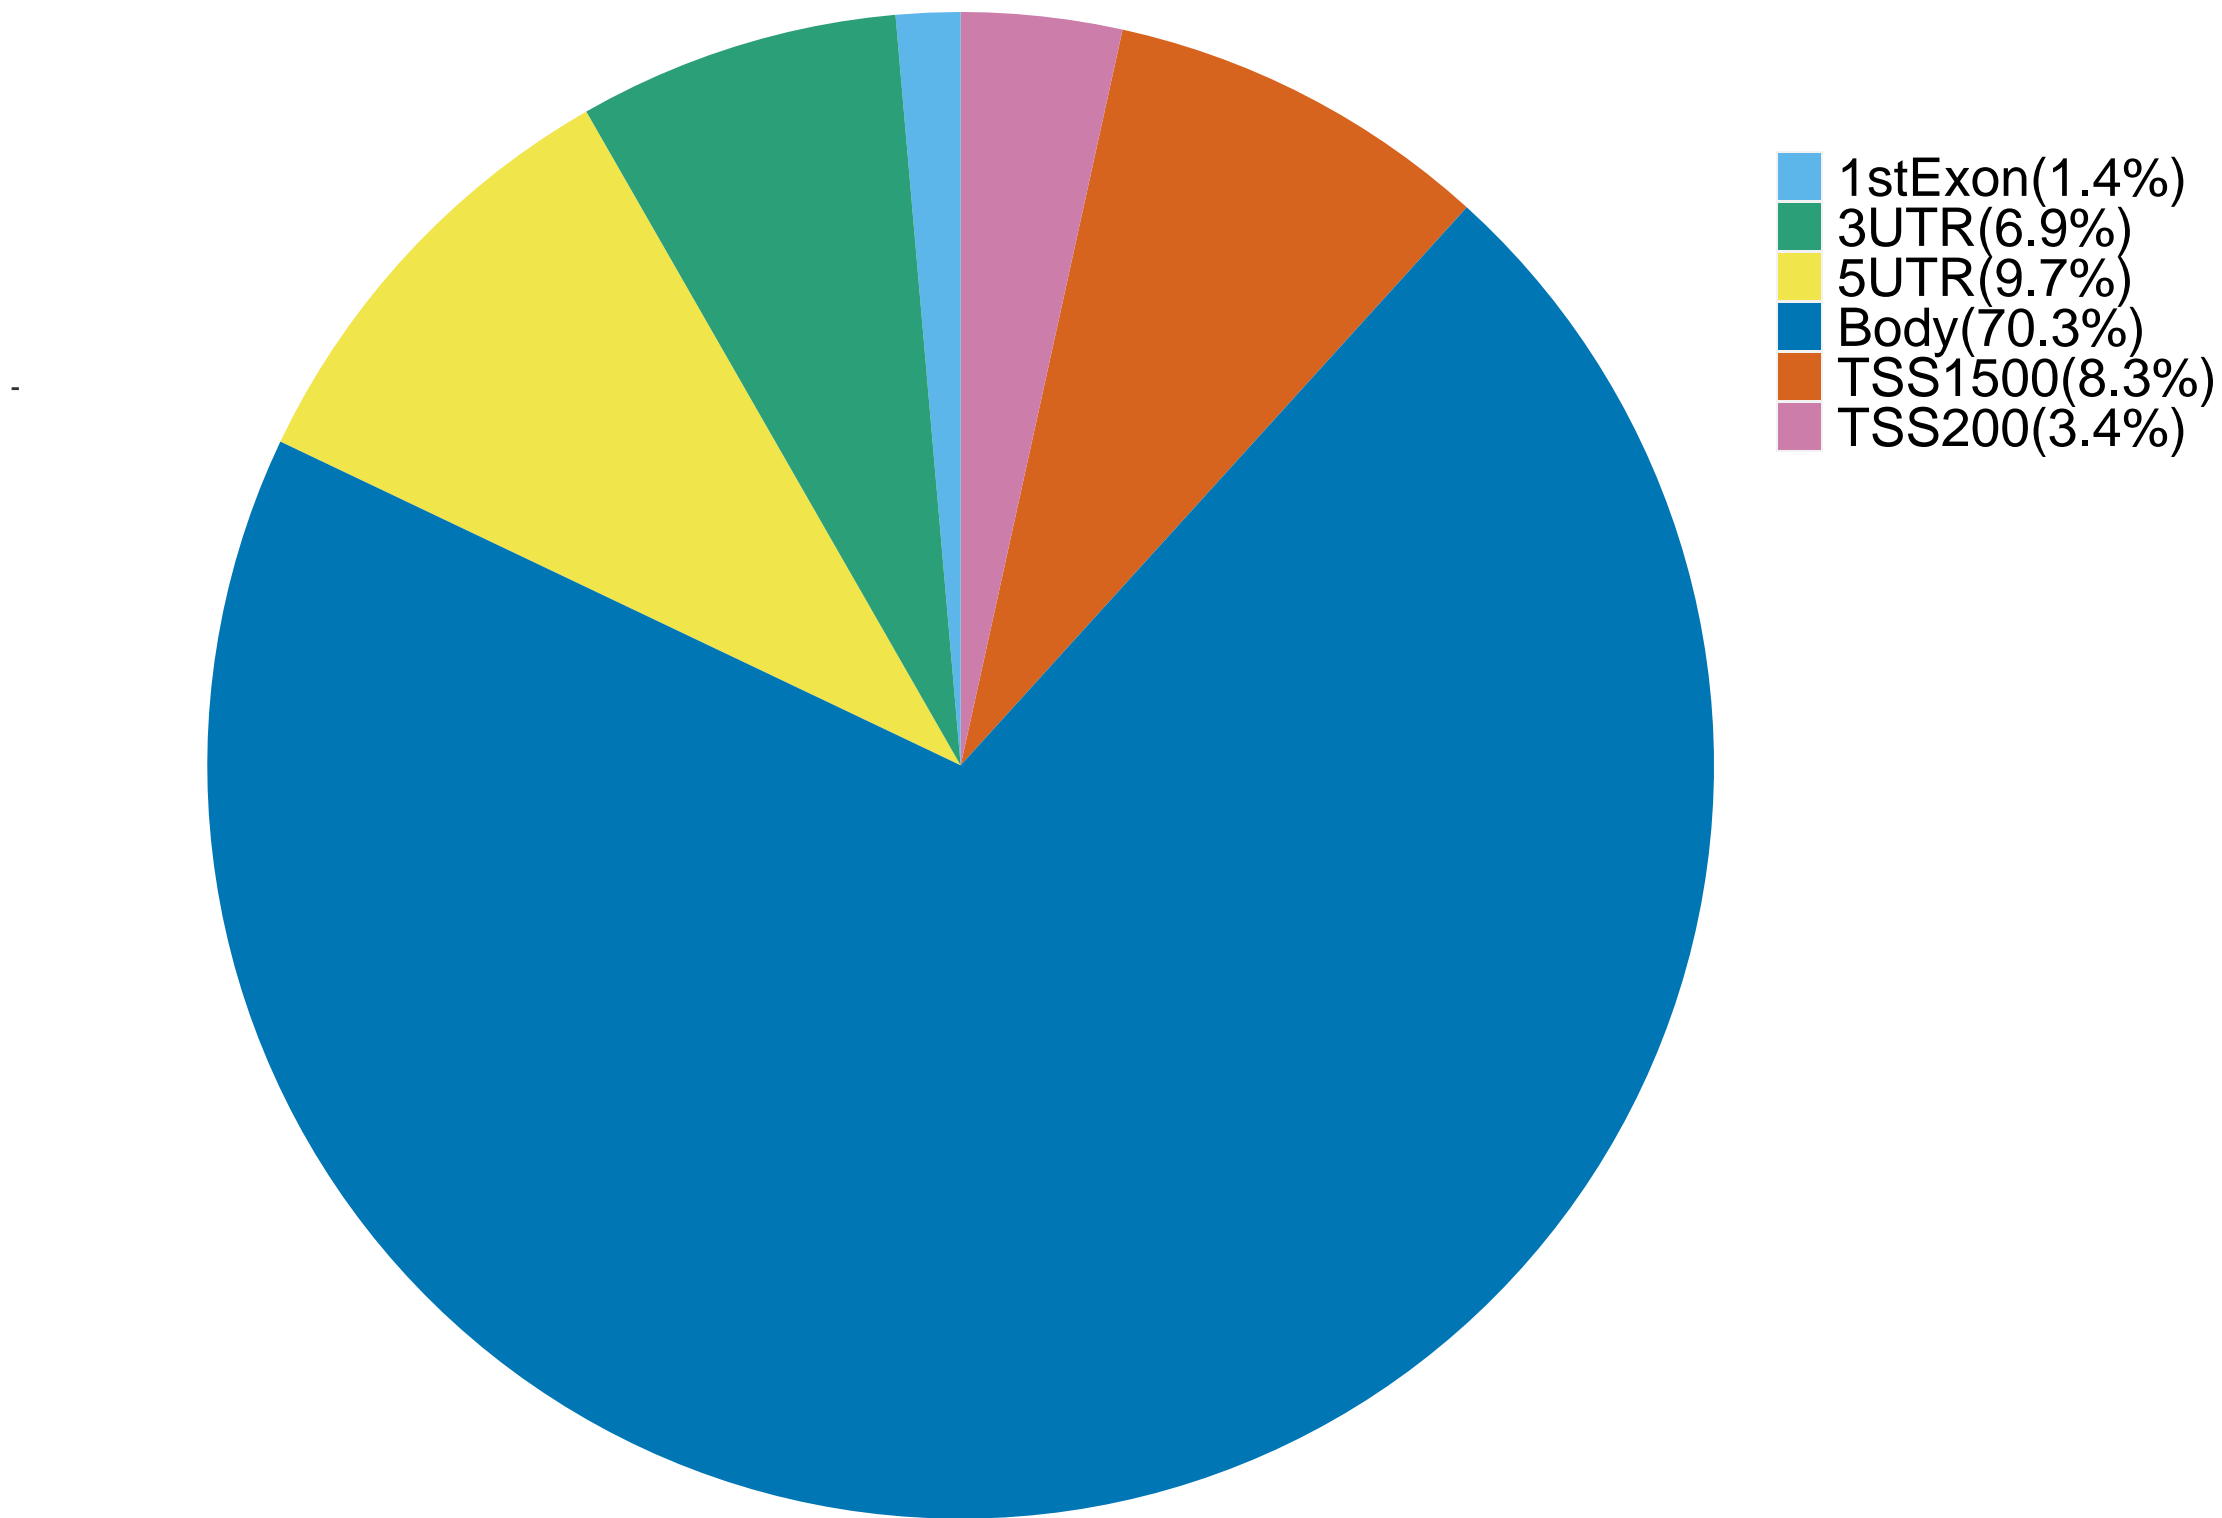

Supplement: f1 [file 9343285.f1.zip]

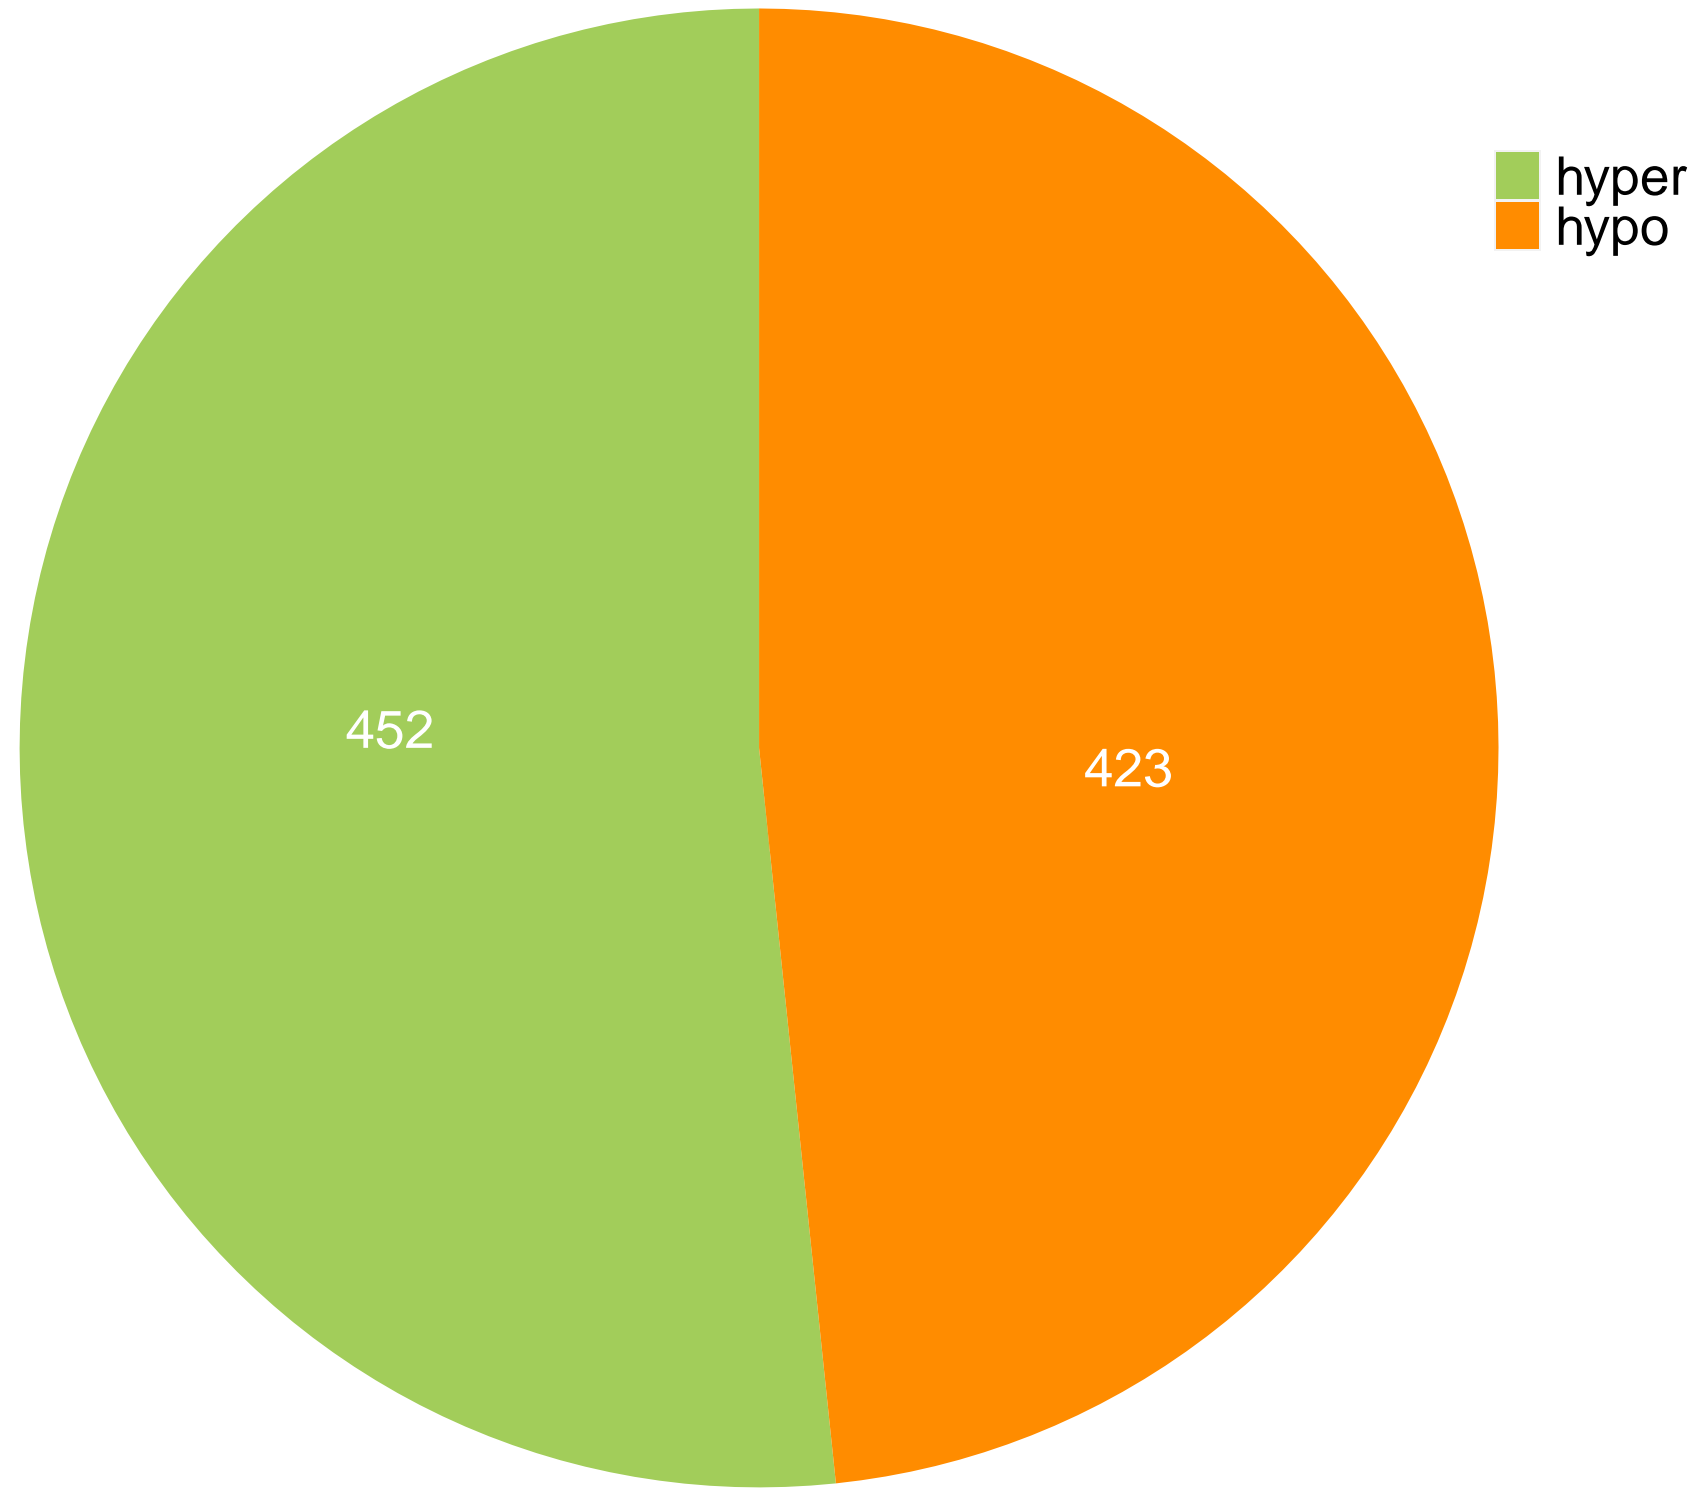

Supplement: f1 [file 9343285.f1.zip]

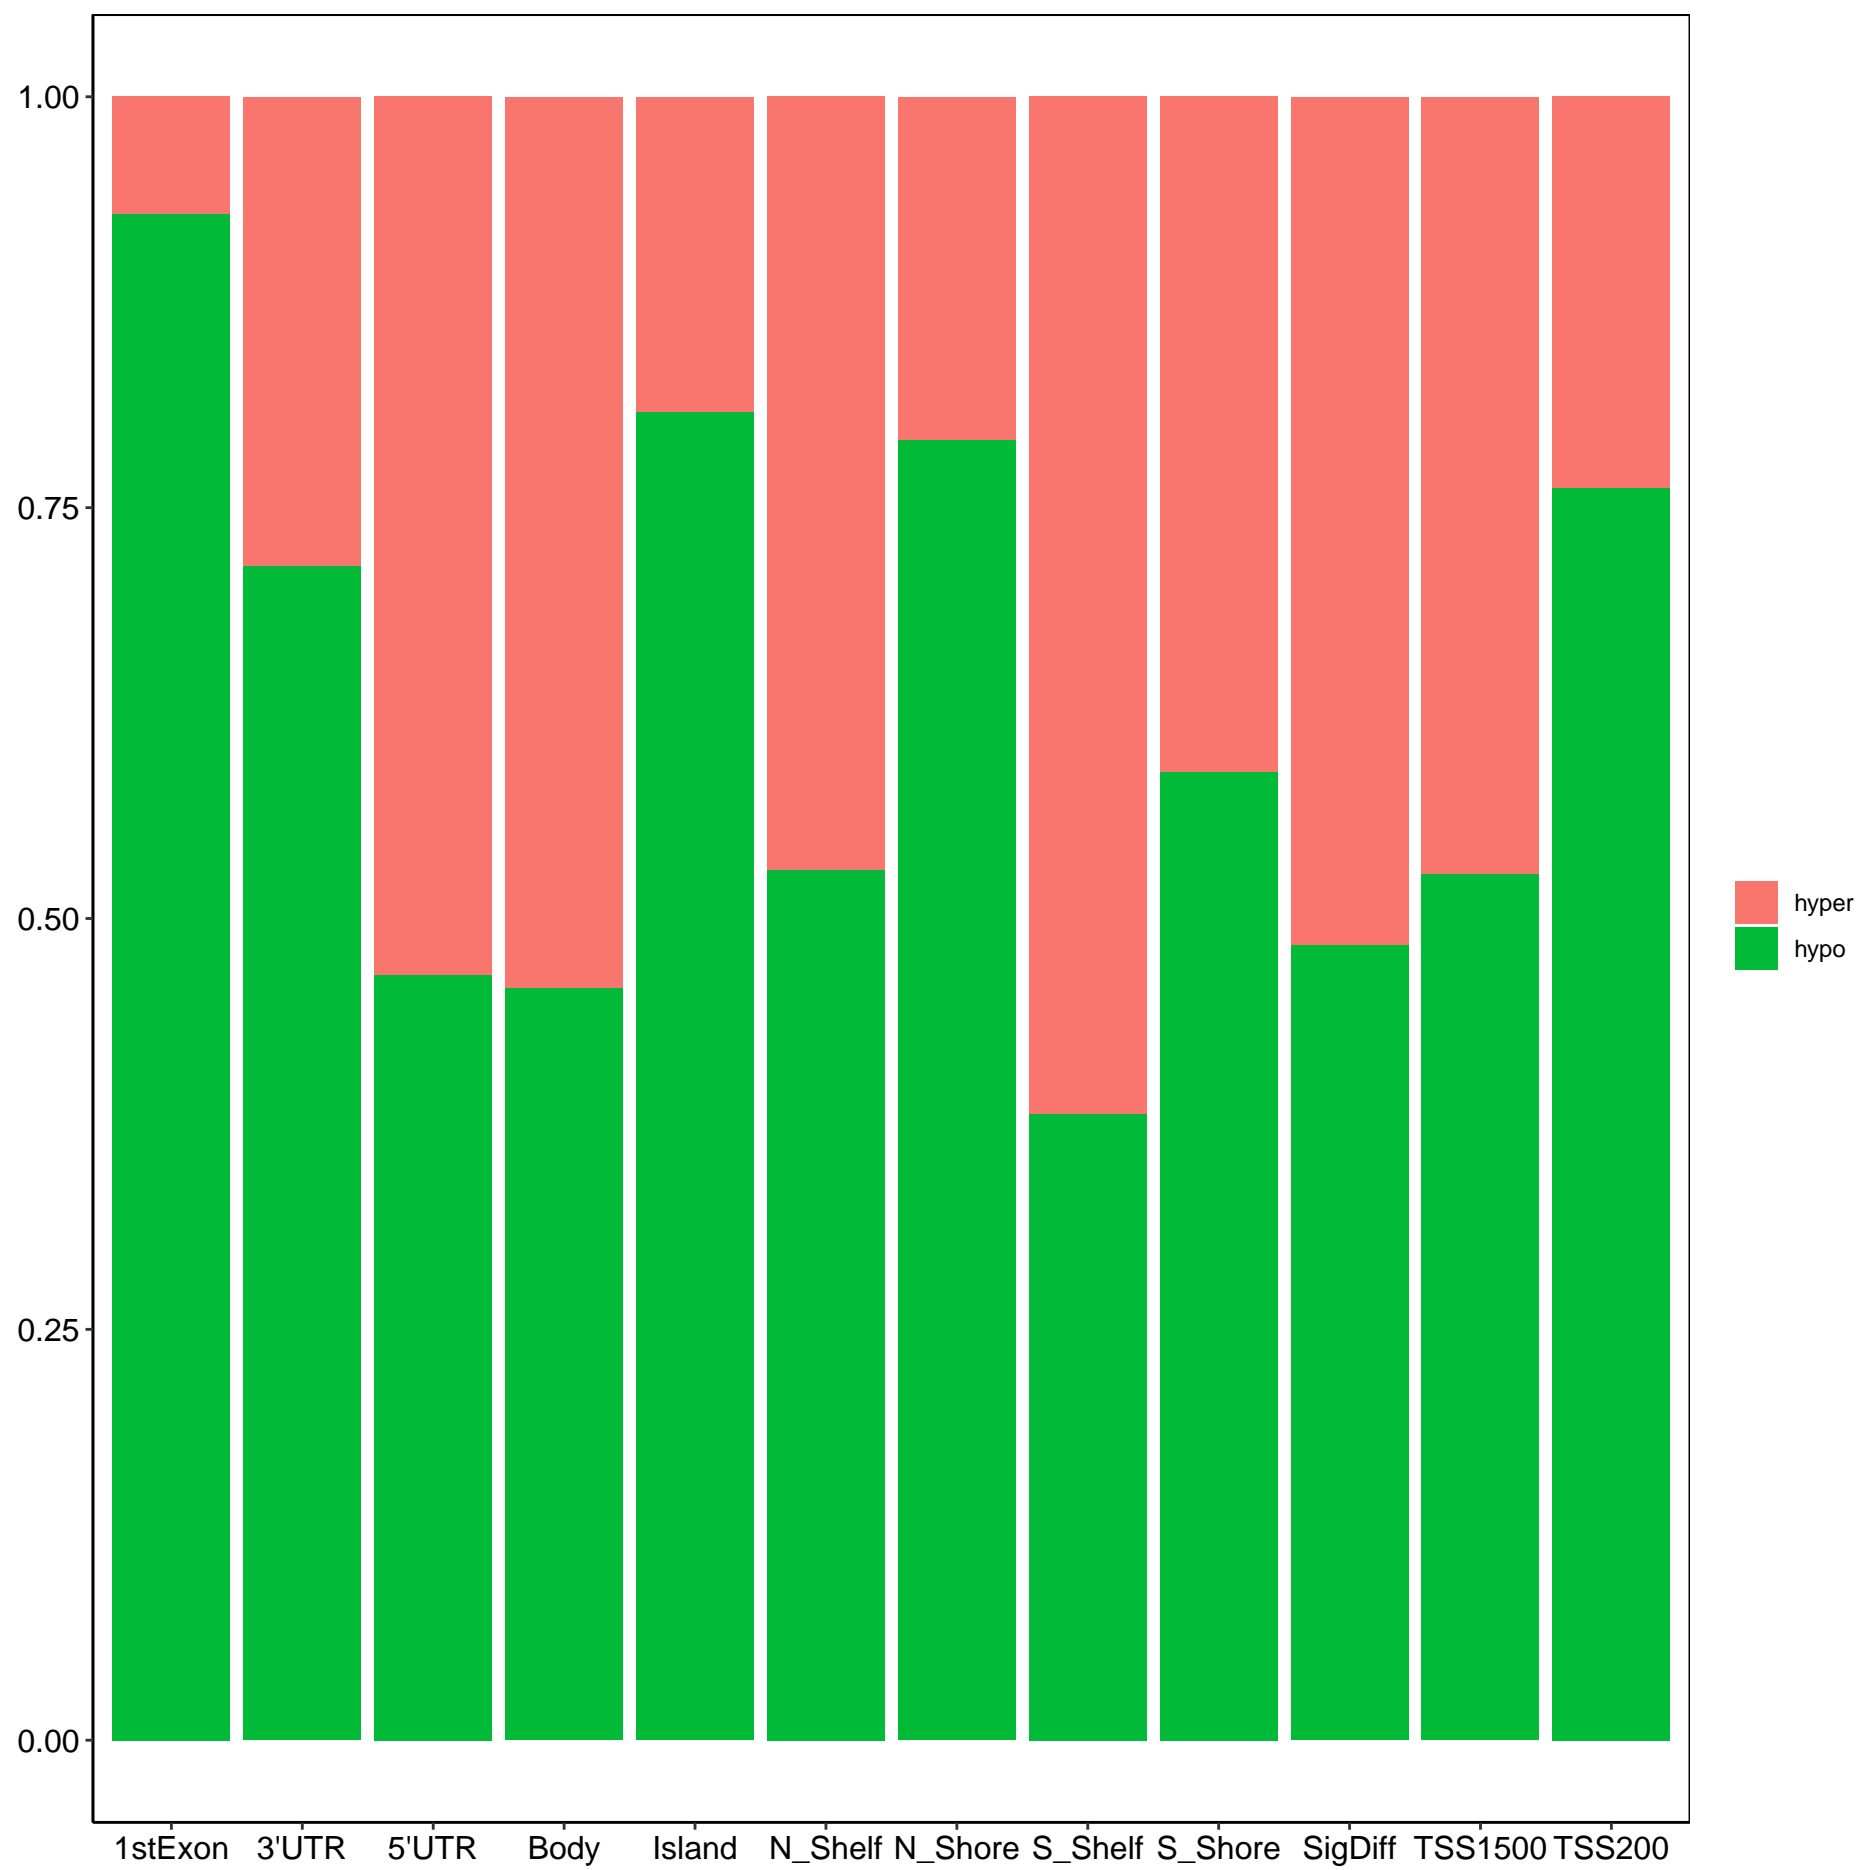

Supplement: f1 [file 9343285.f1.zip]

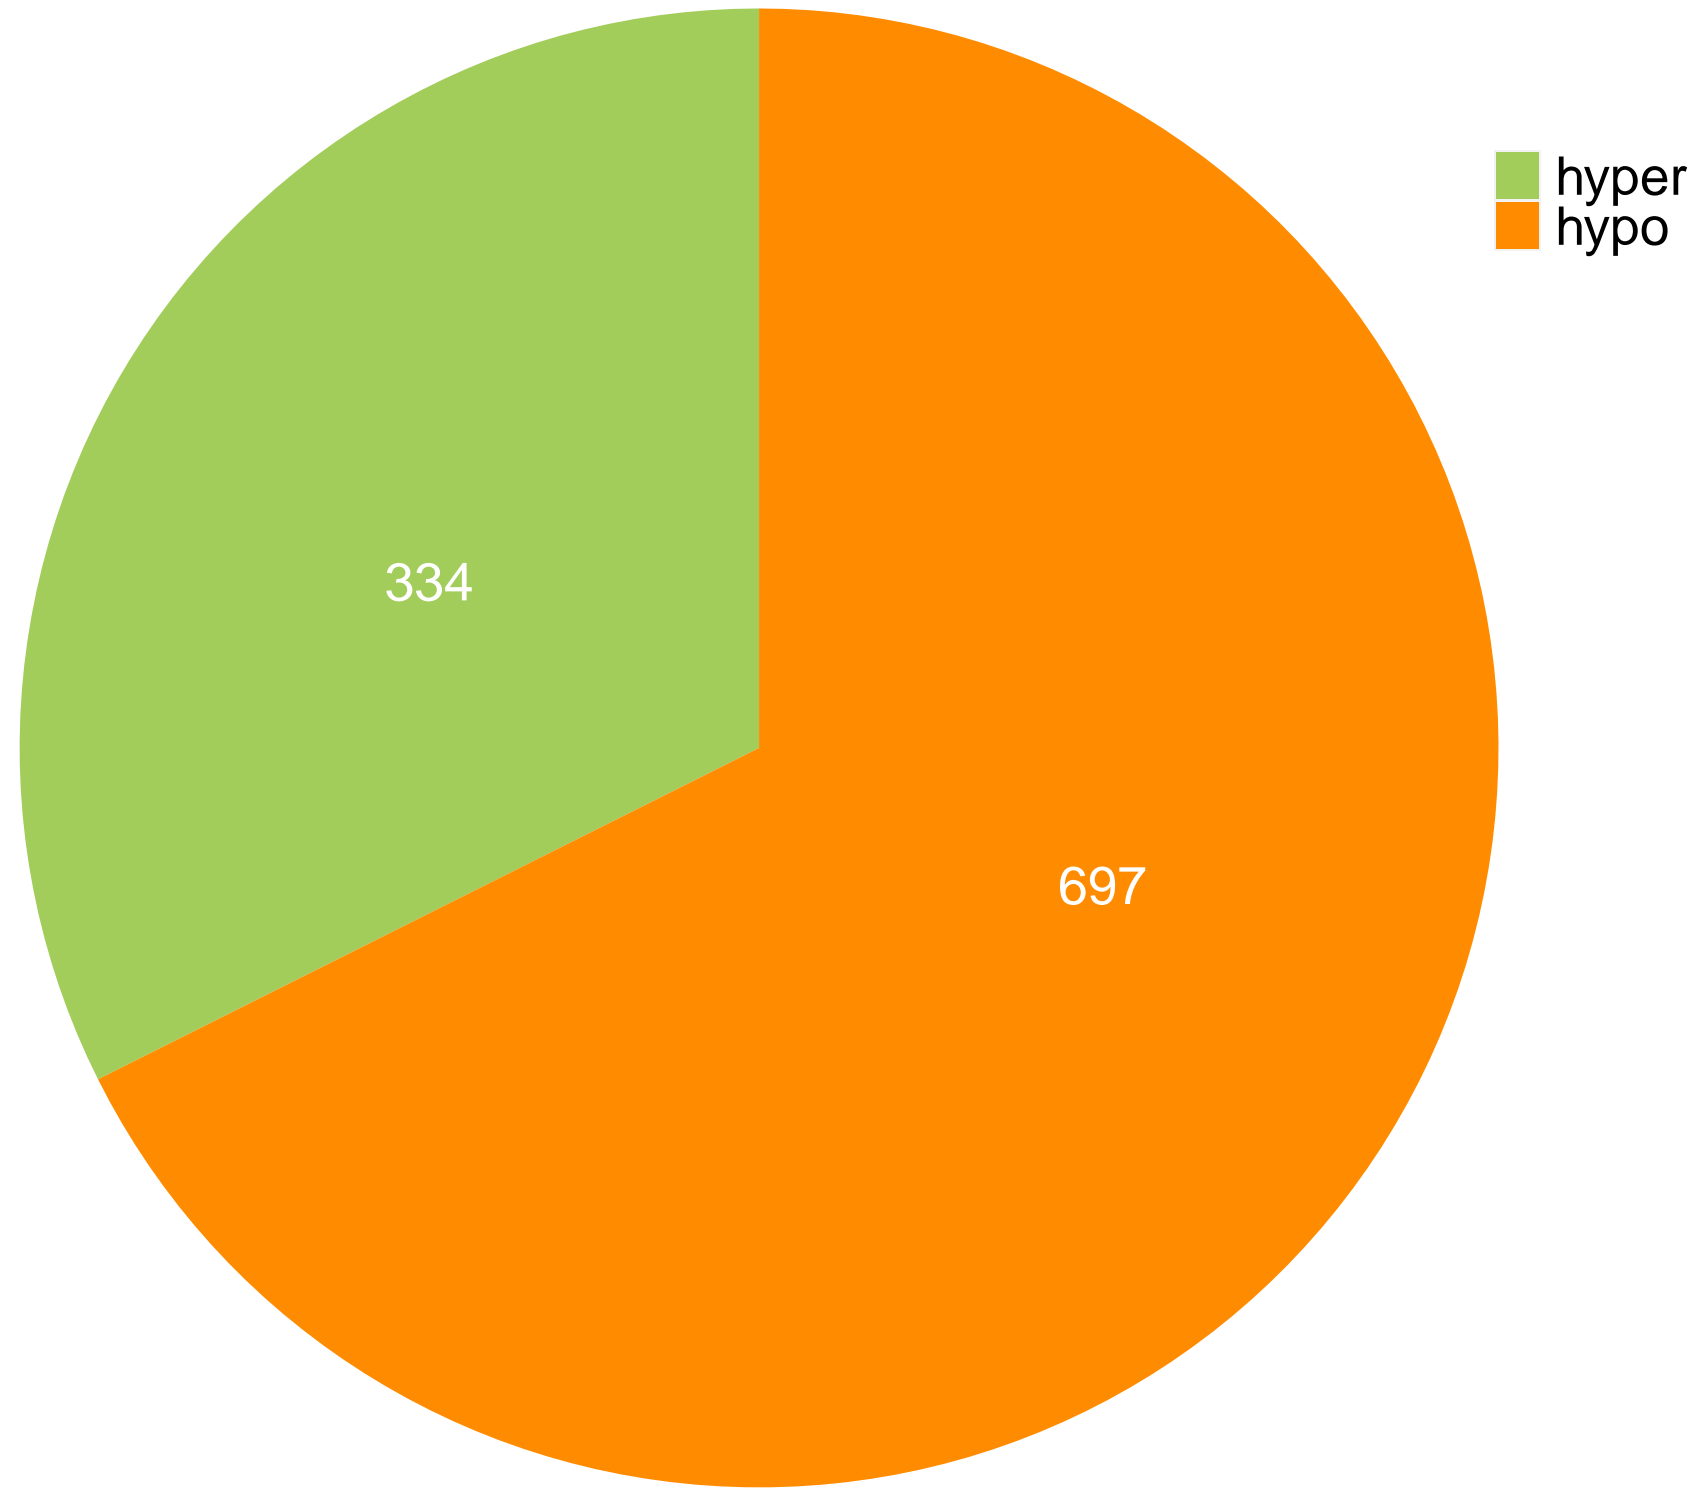

Supplement: f1 [file 9343285.f1.zip]

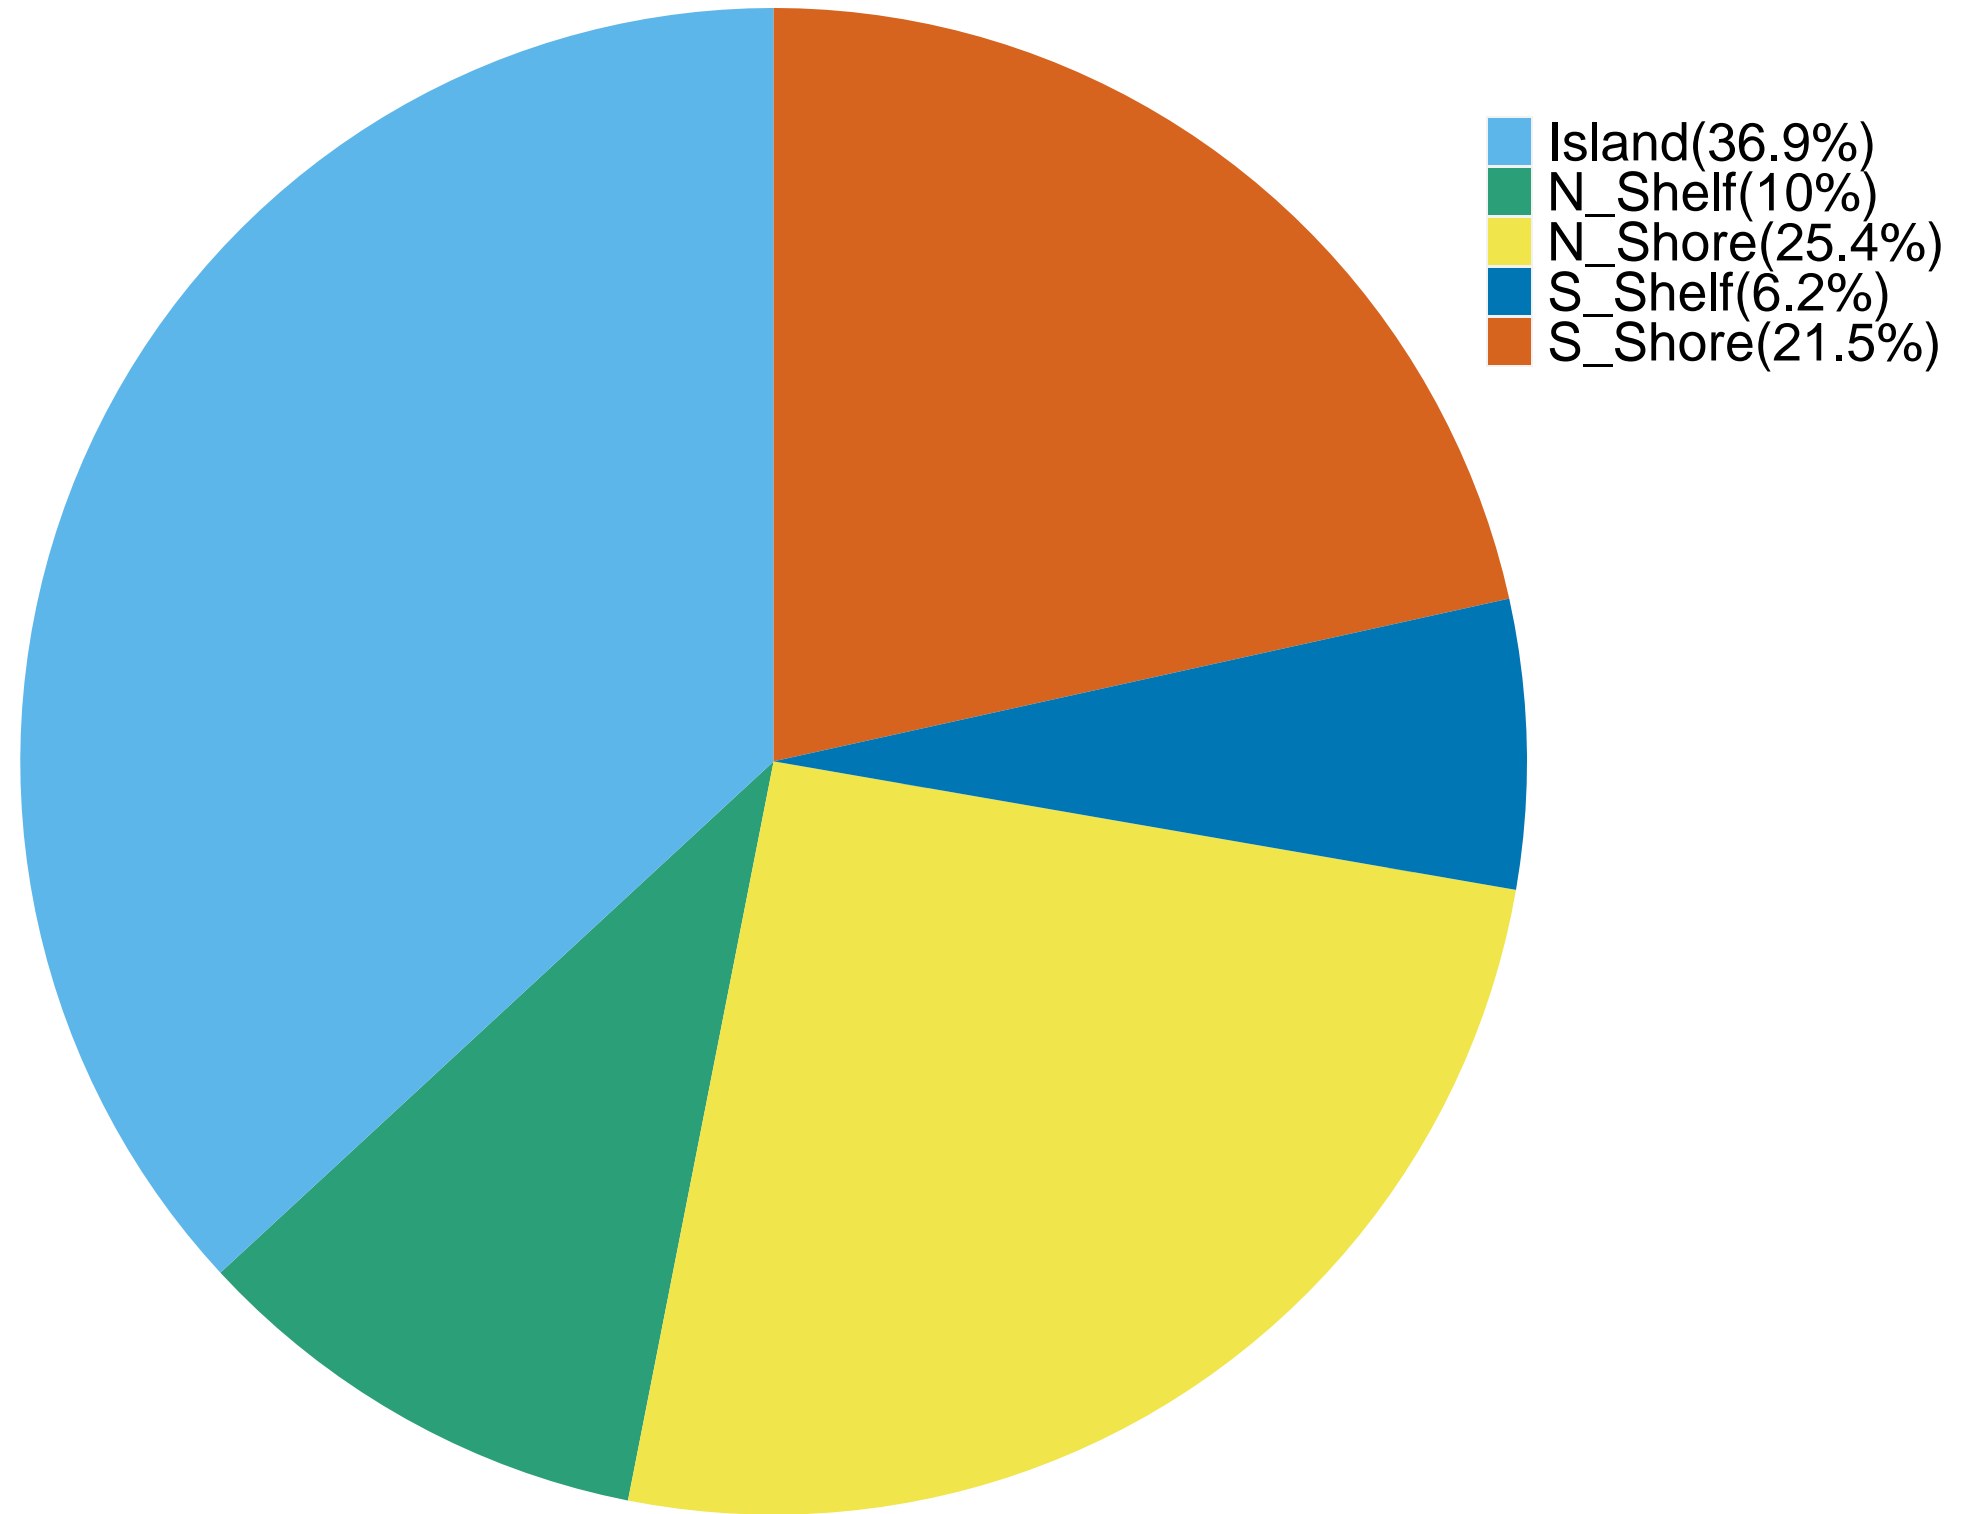

Supplement: f1 [file 9343285.f1.zip]

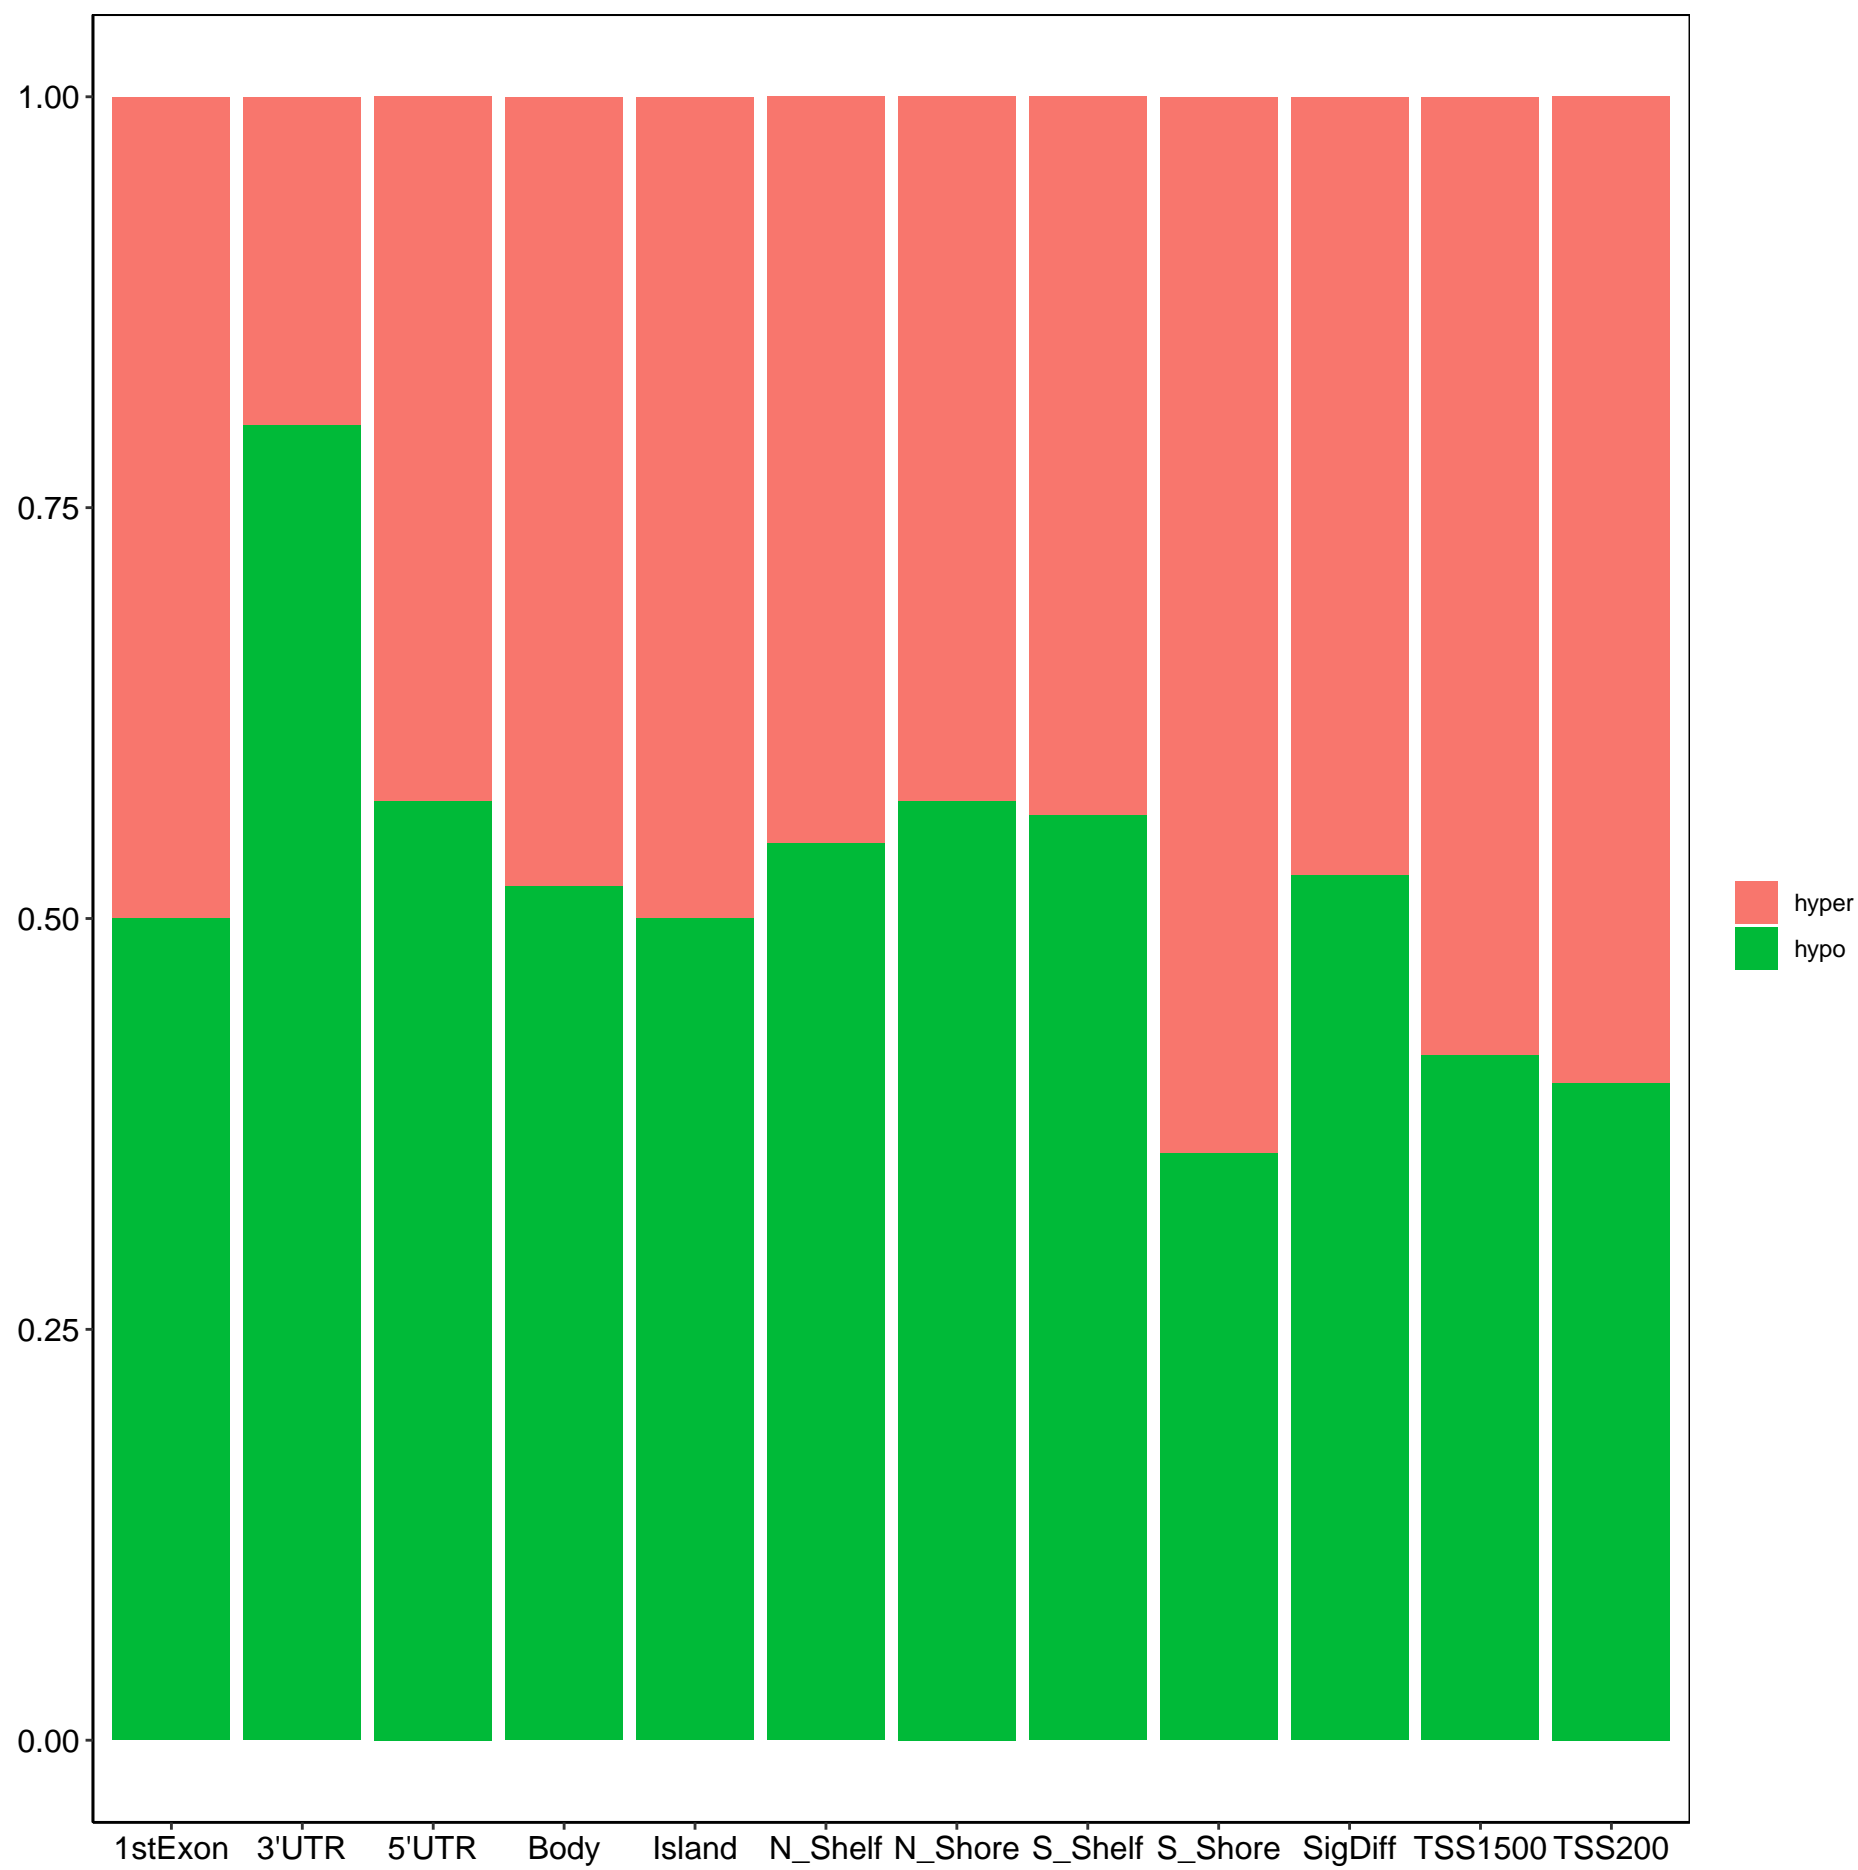

Supplement: f1 [file 9343285.f1.zip]

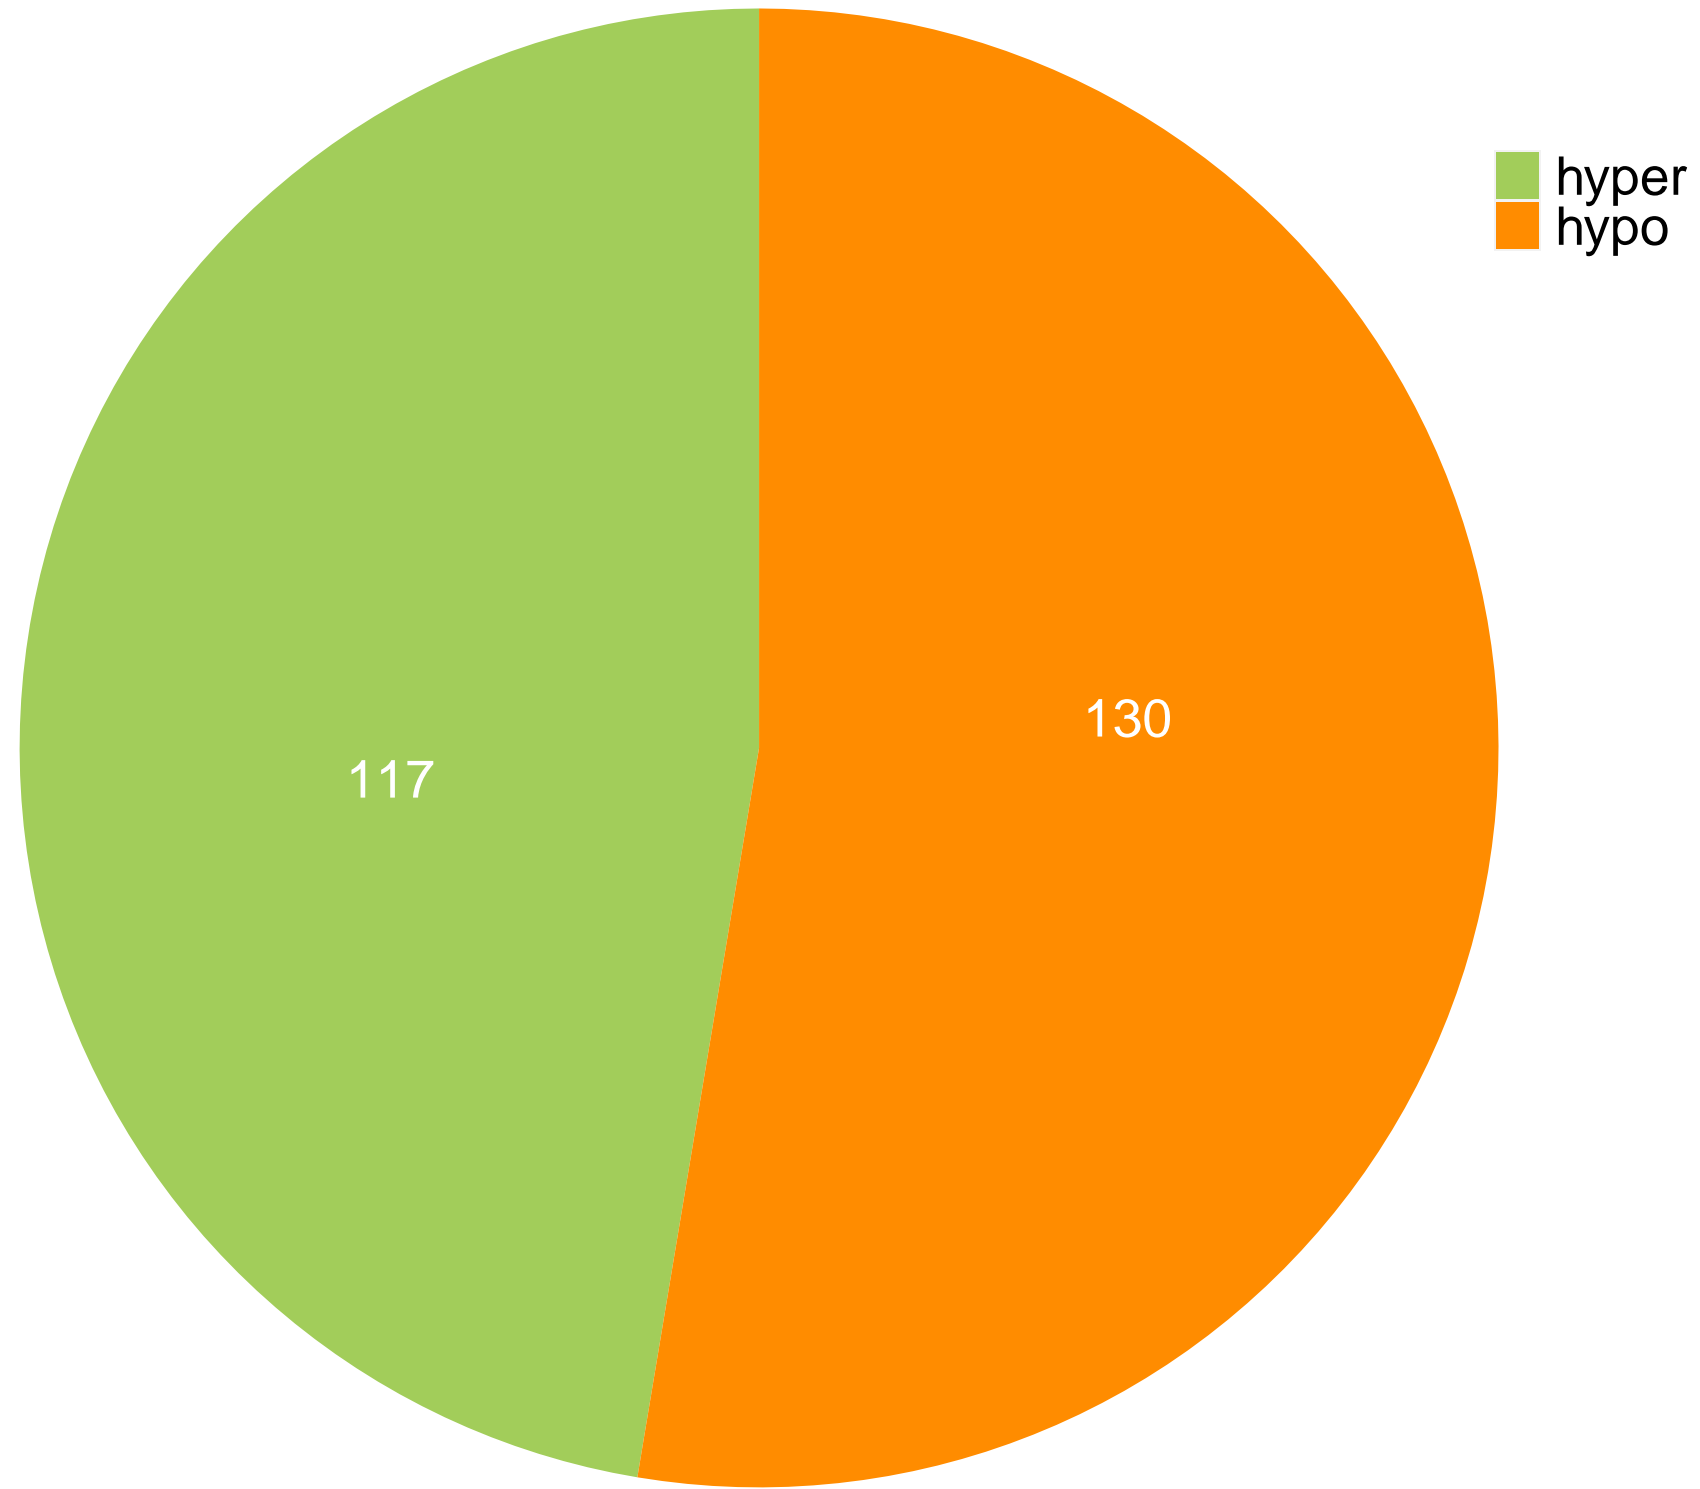

Supplement: f1 [file 9343285.f1.zip]

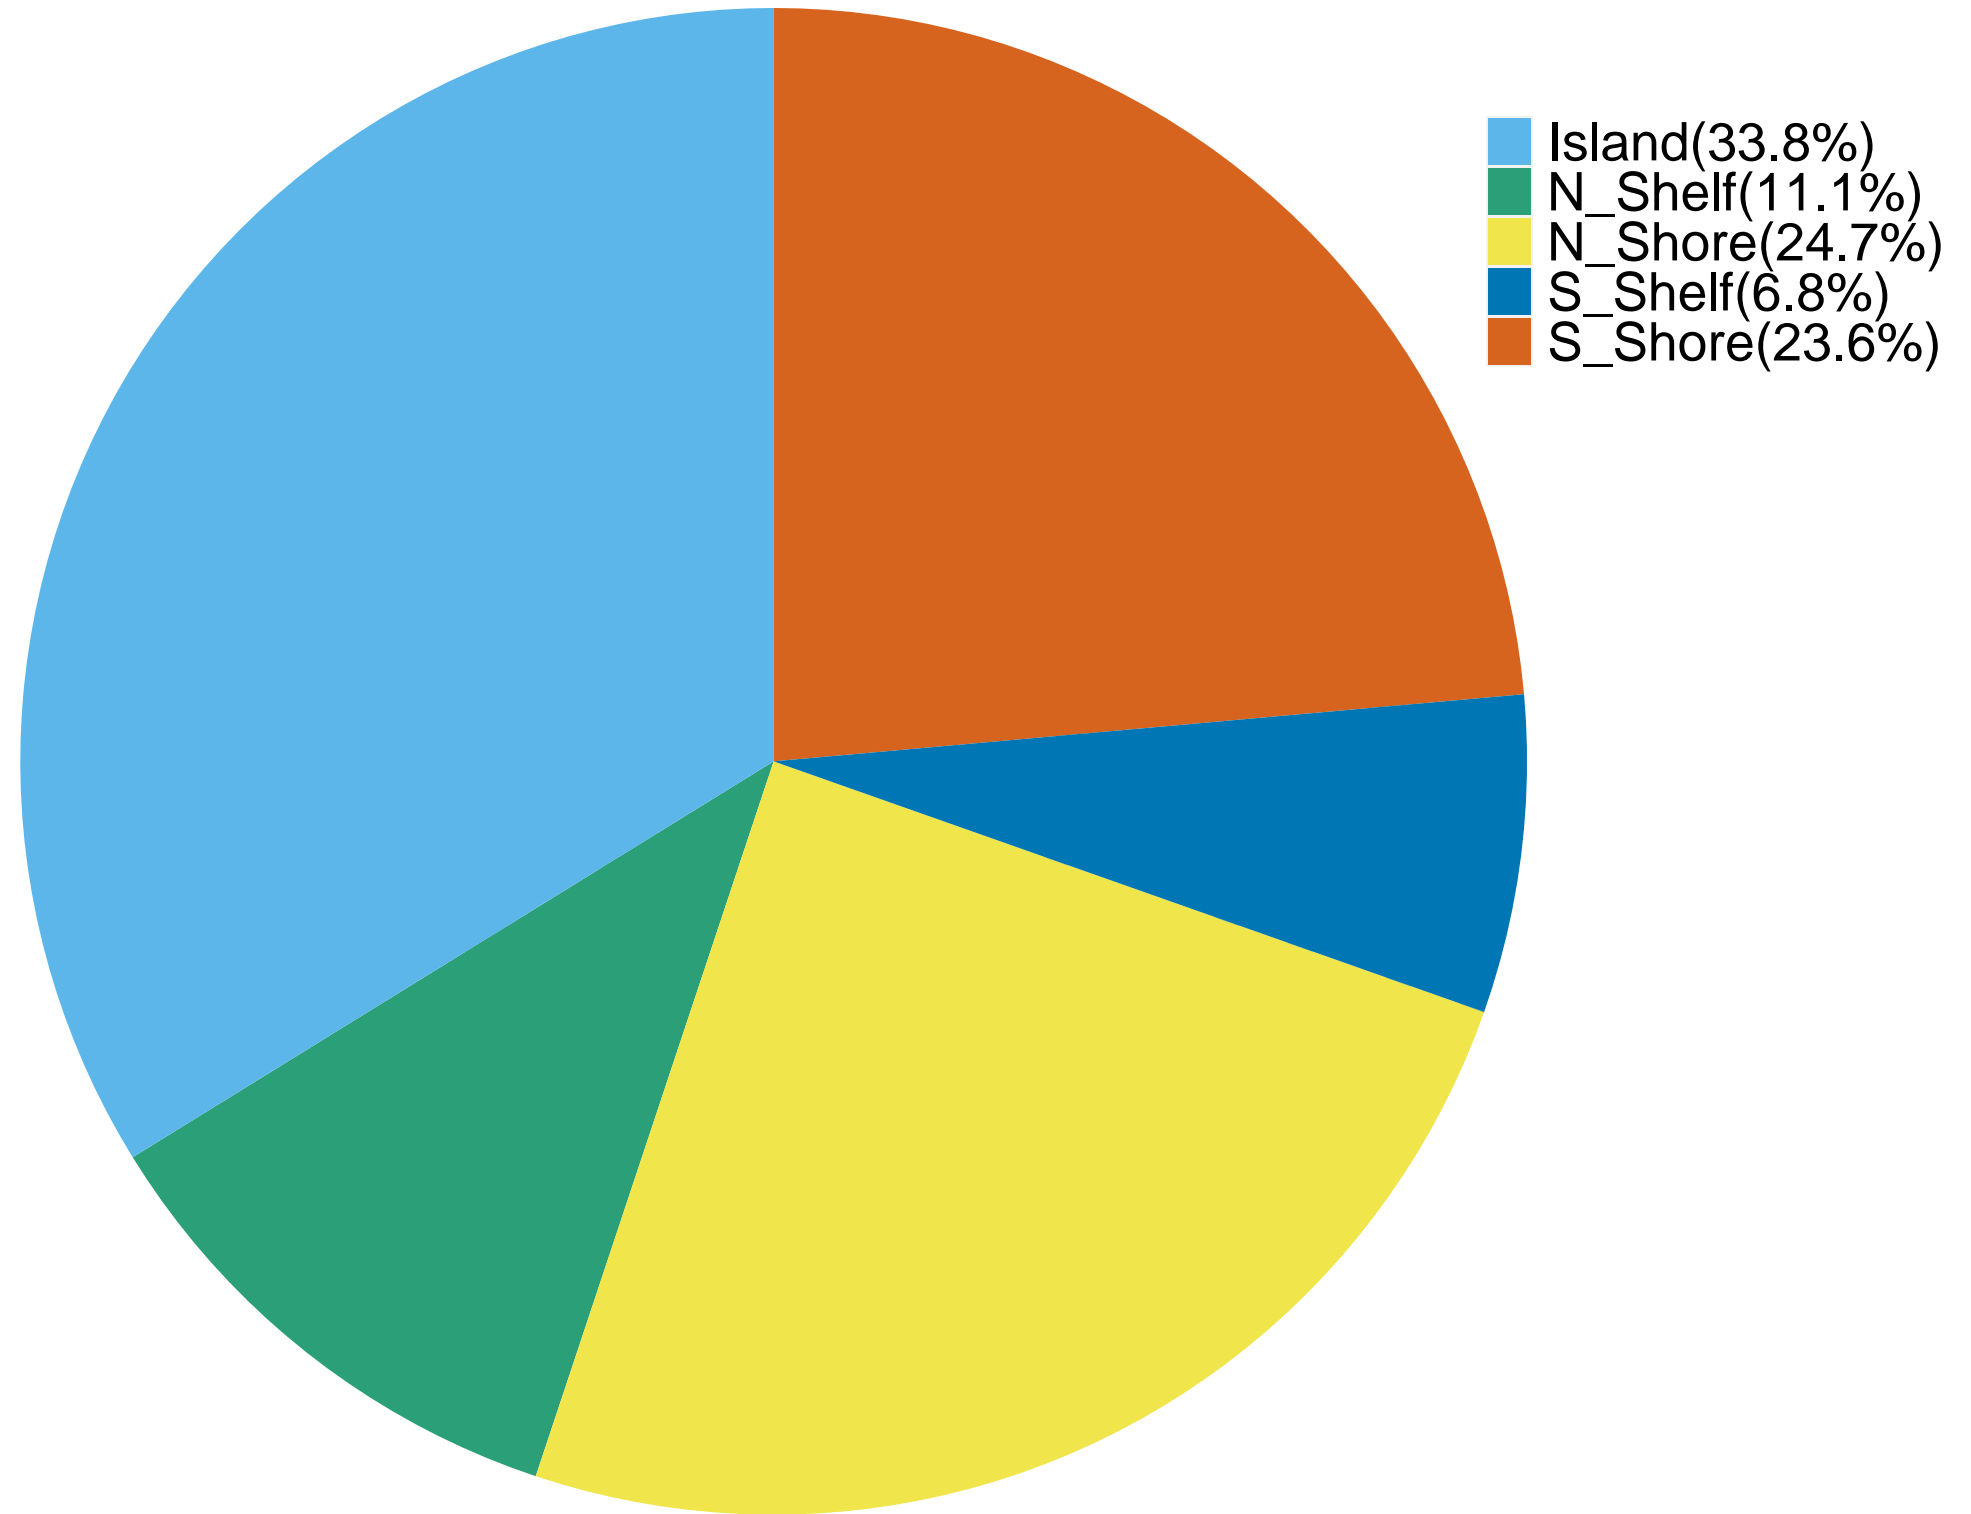

Supplement: f1 [file 9343285.f1.zip]

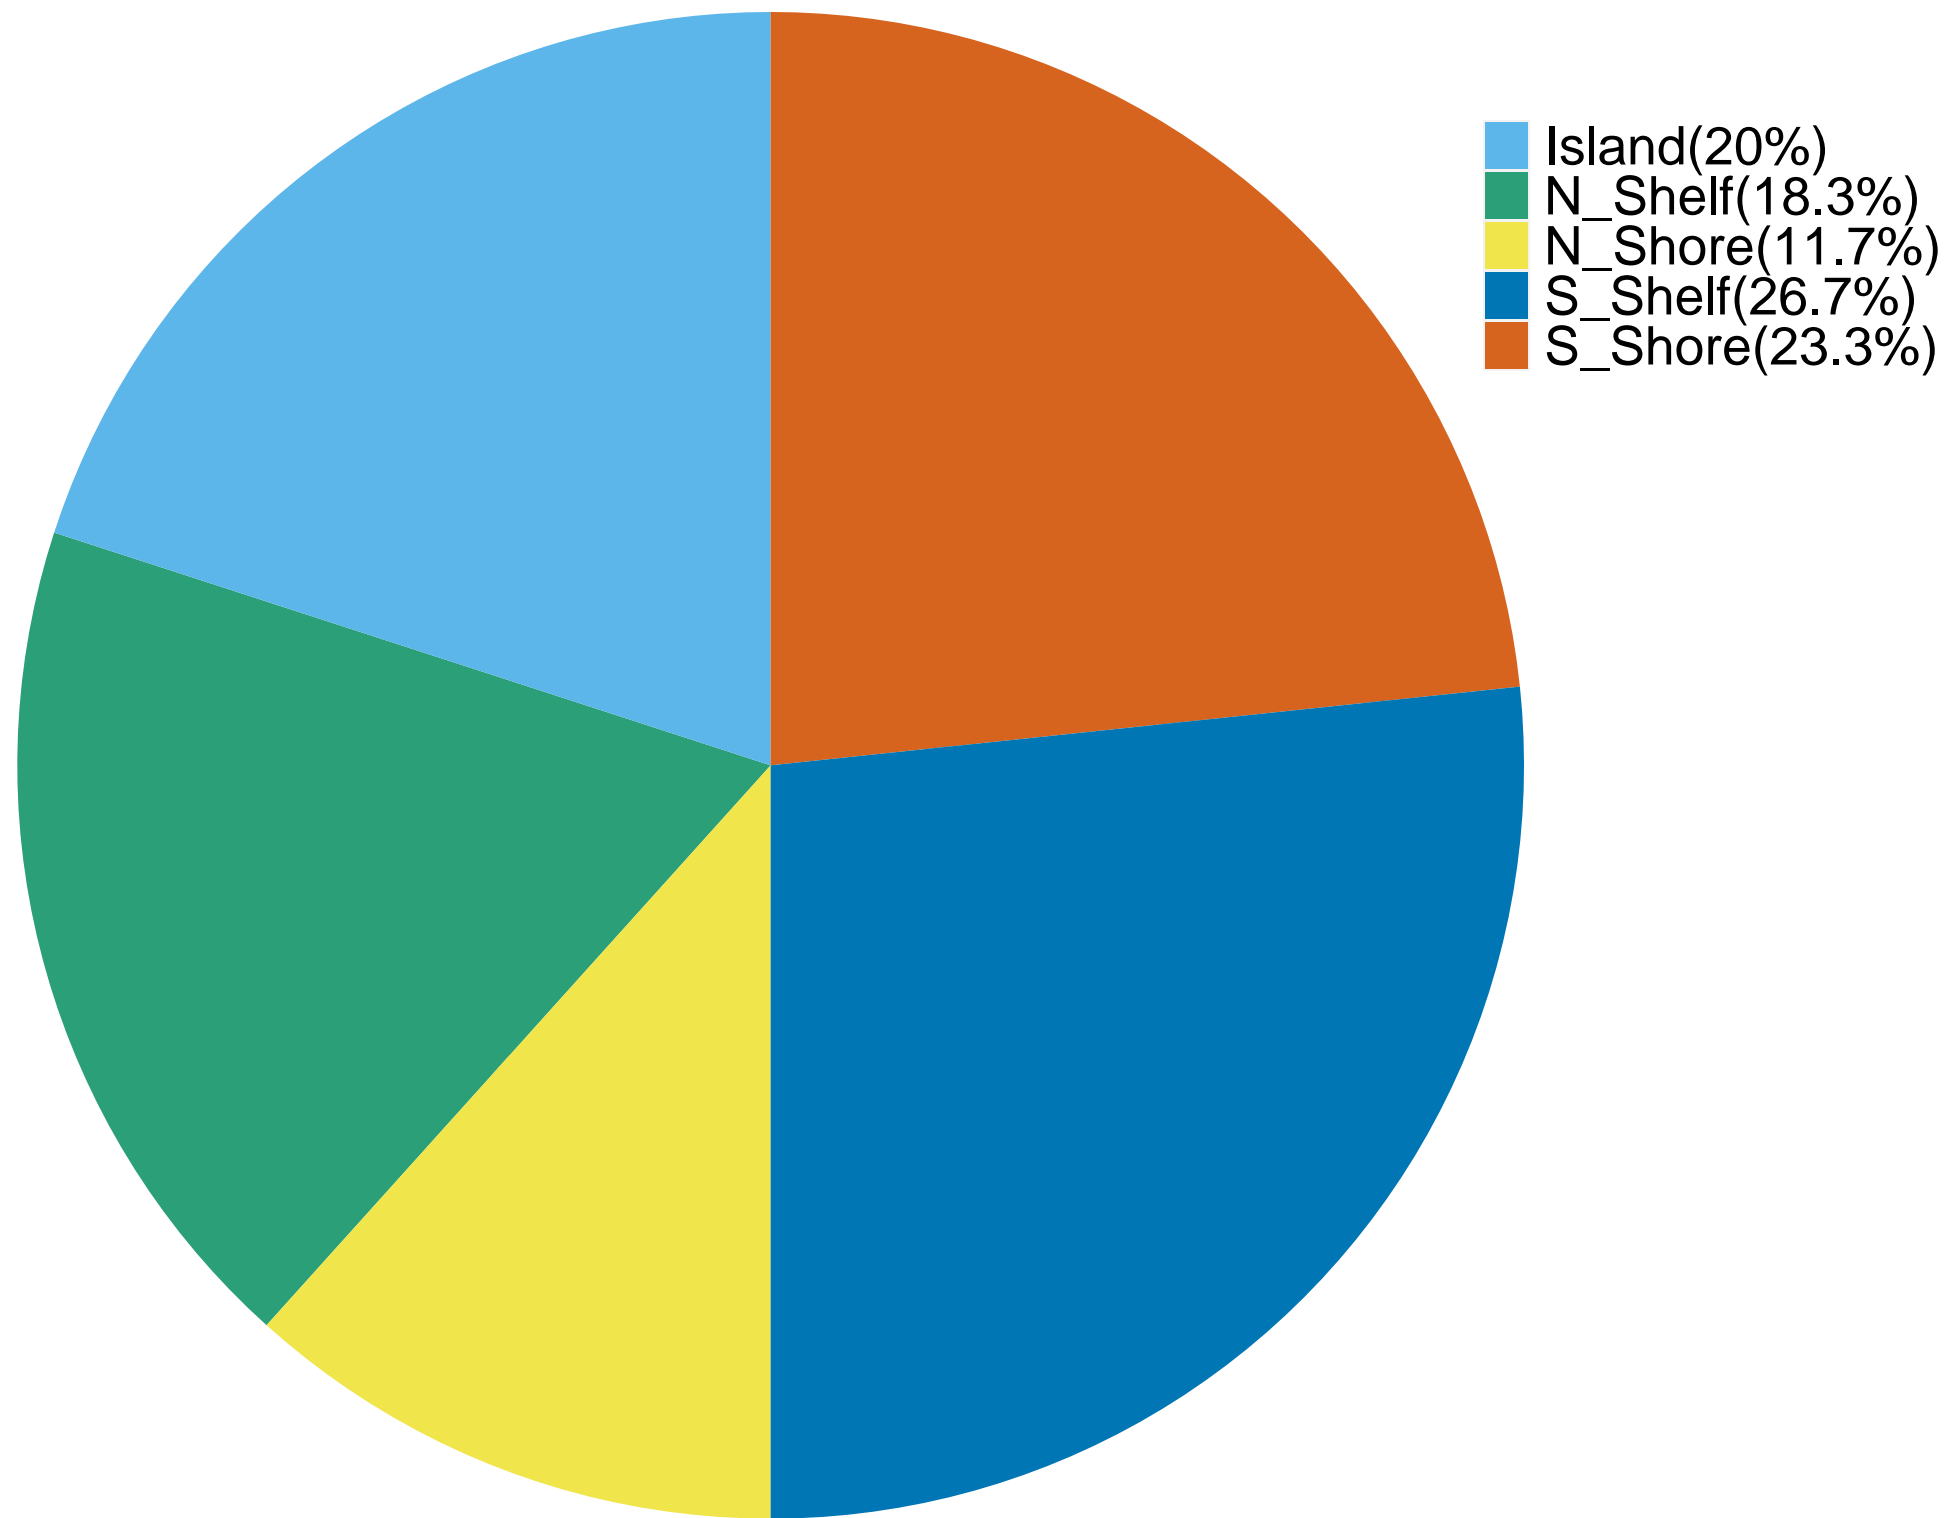

Supplement: f1 [file 9343285.f1.zip]

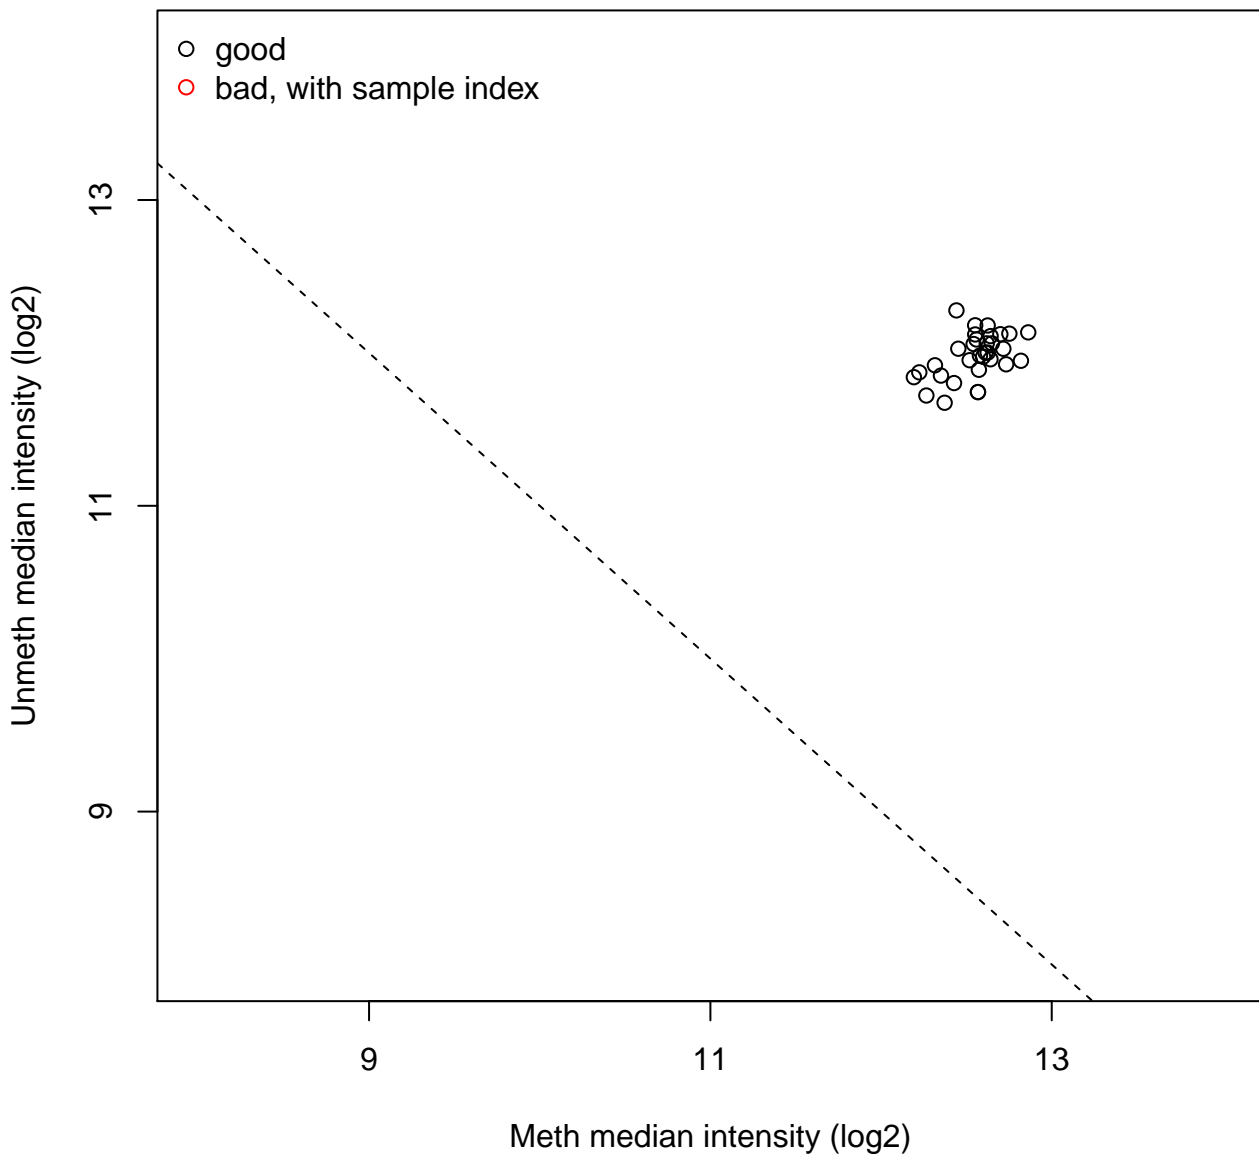

Supplement: f1 [file 9343285.f1.zip]

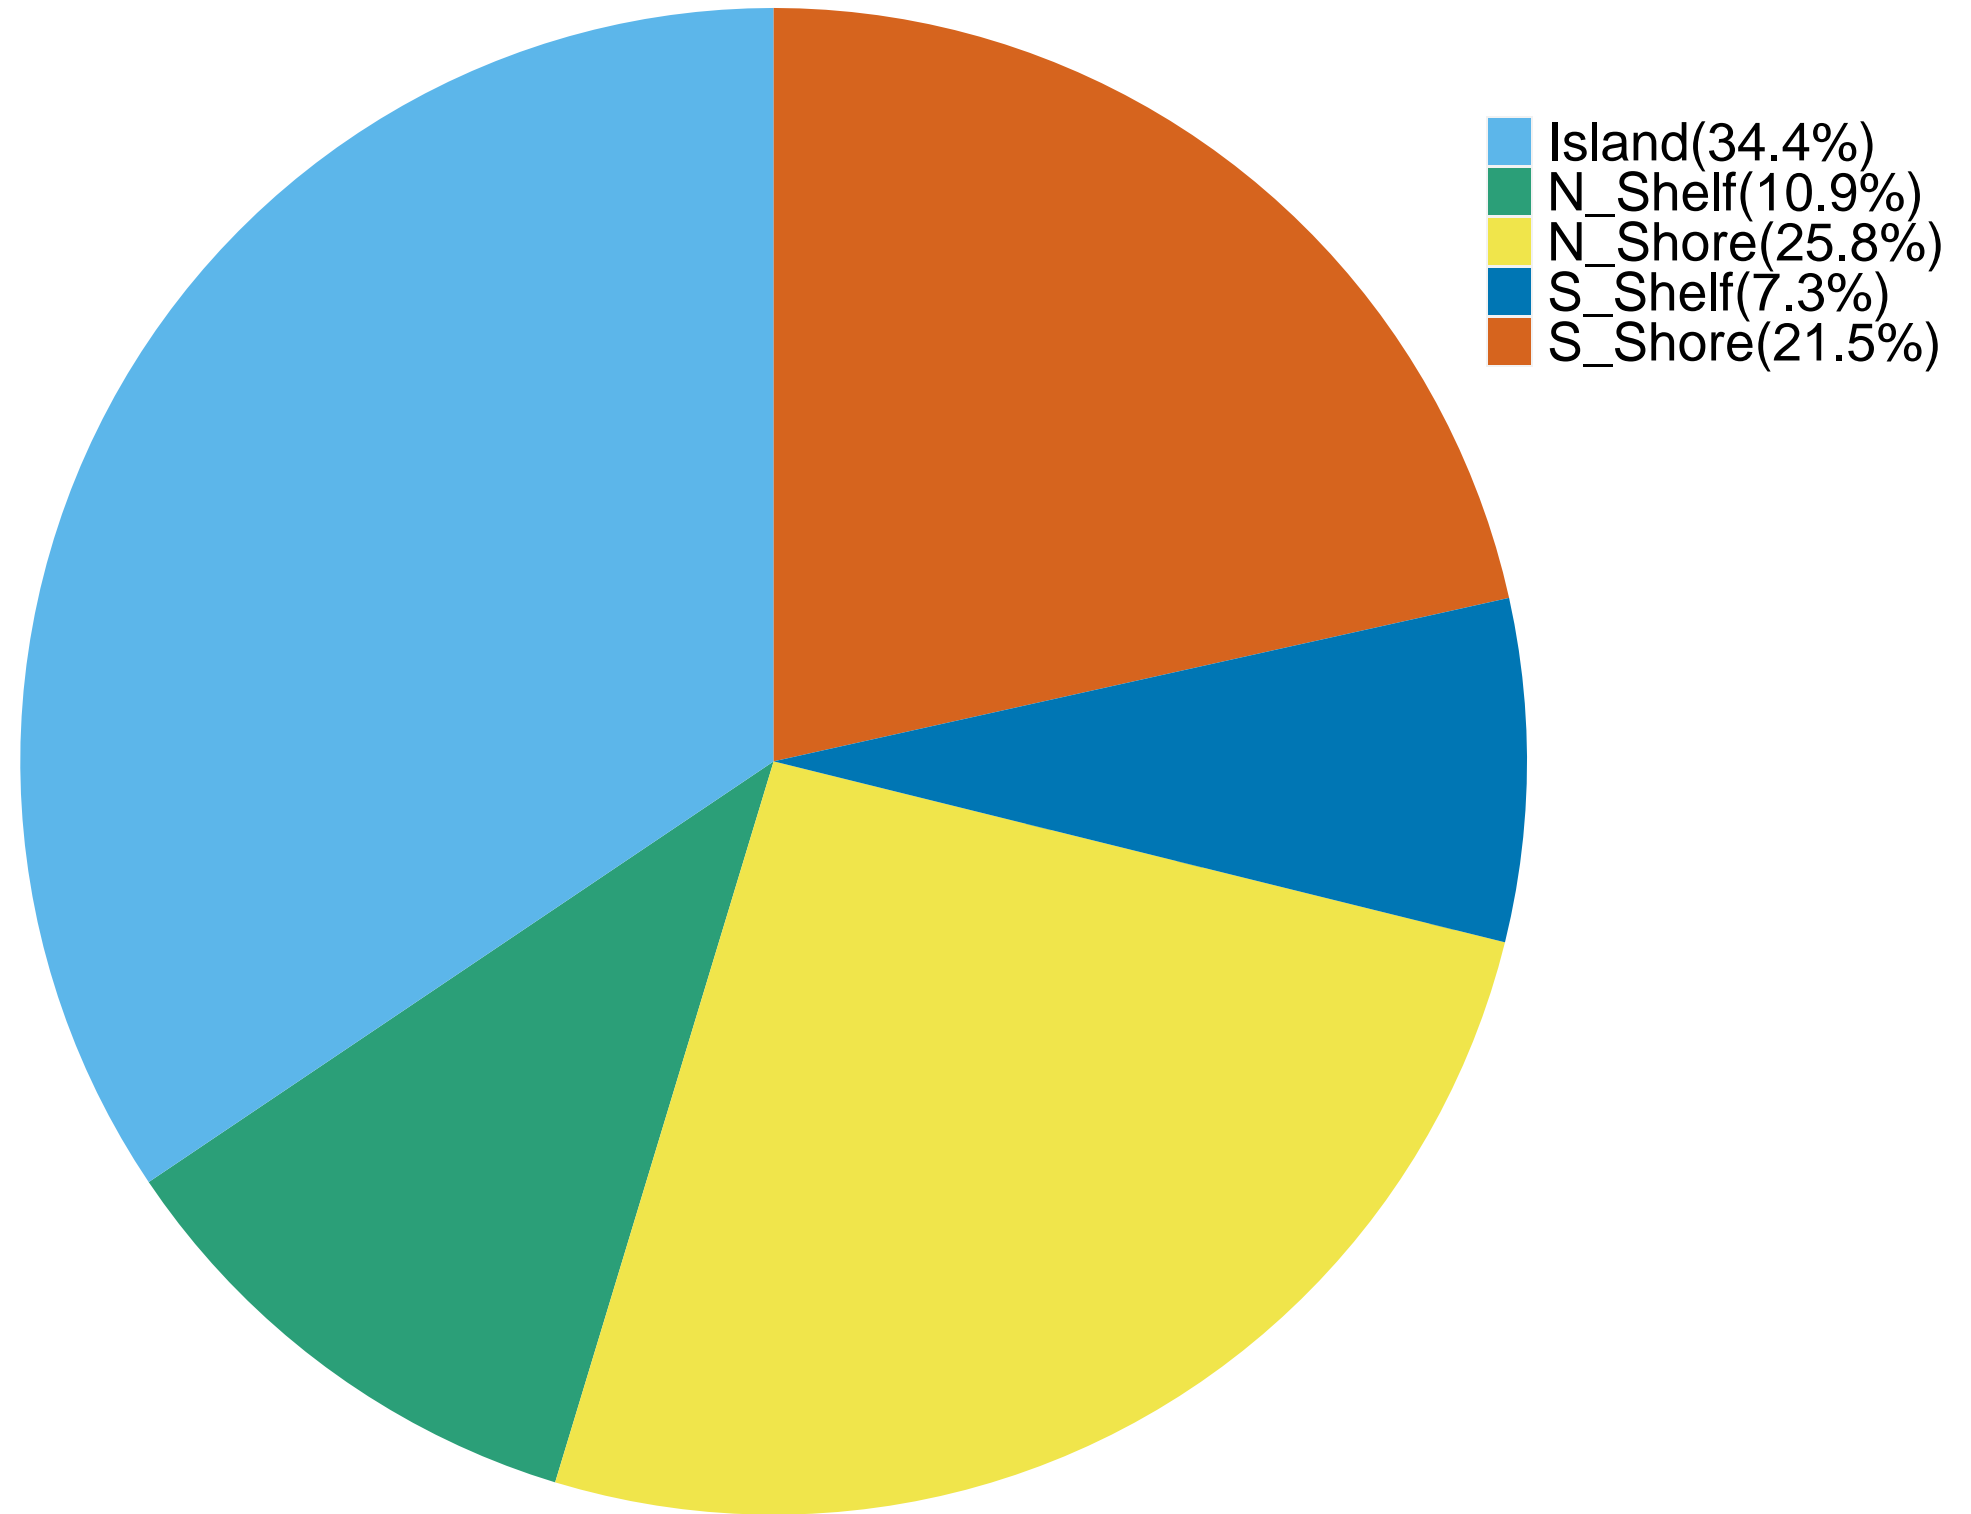

Supplement: f1 [file 9343285.f1.zip]

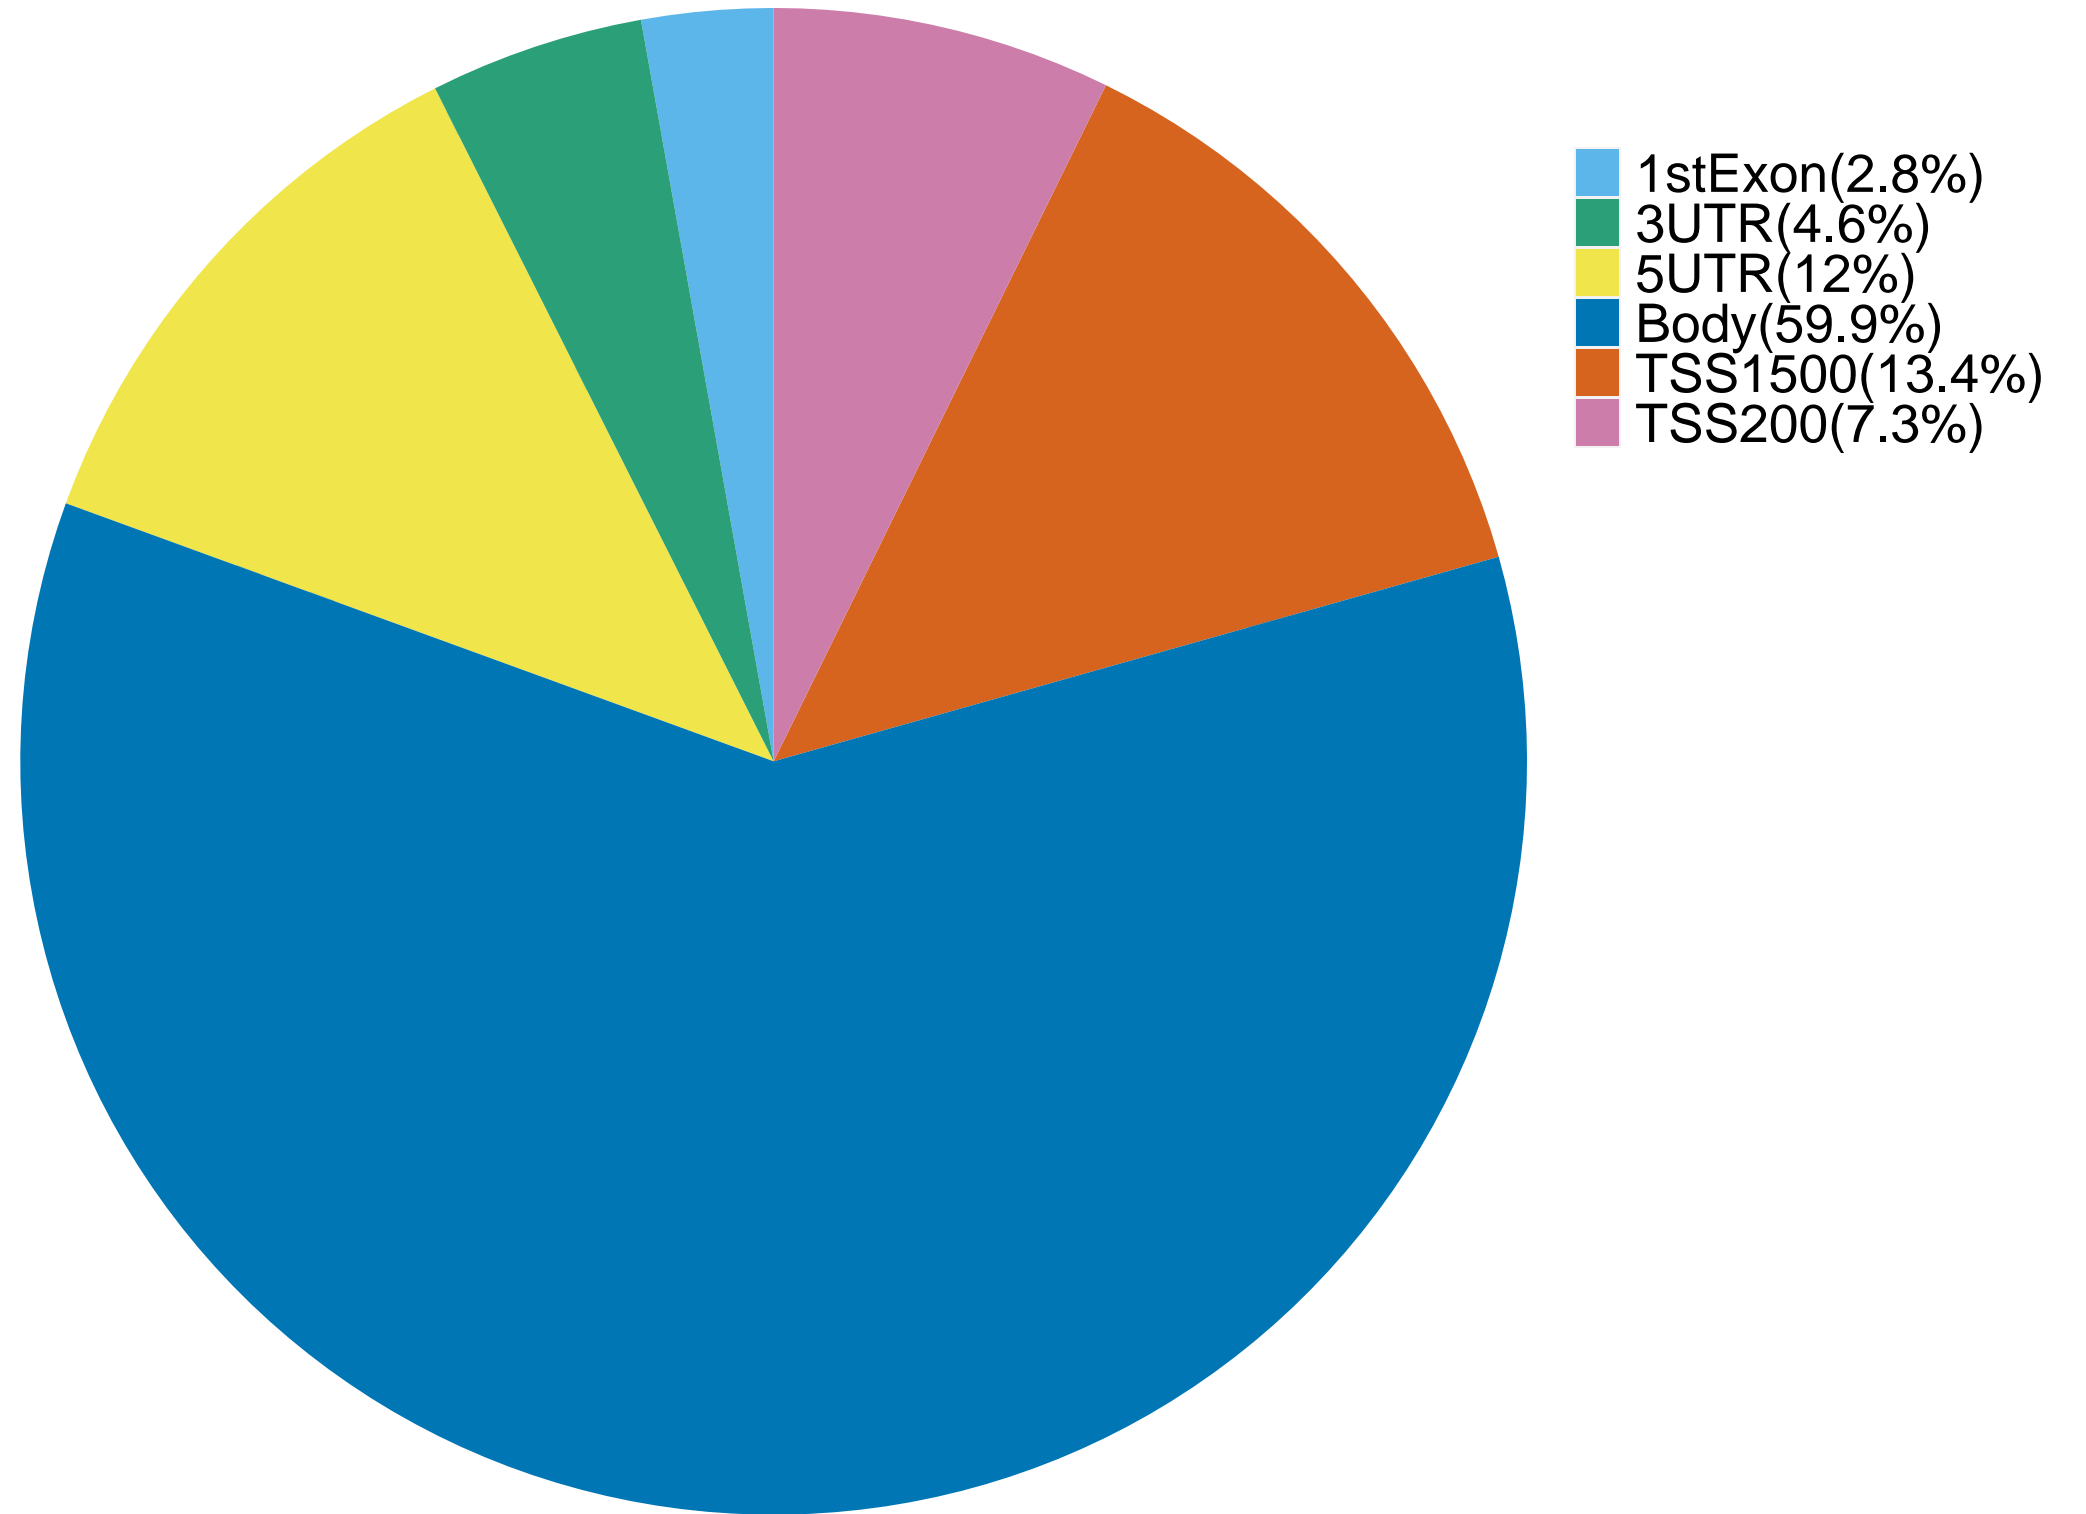

Supplement: f1 [file 9343285.f1.zip]

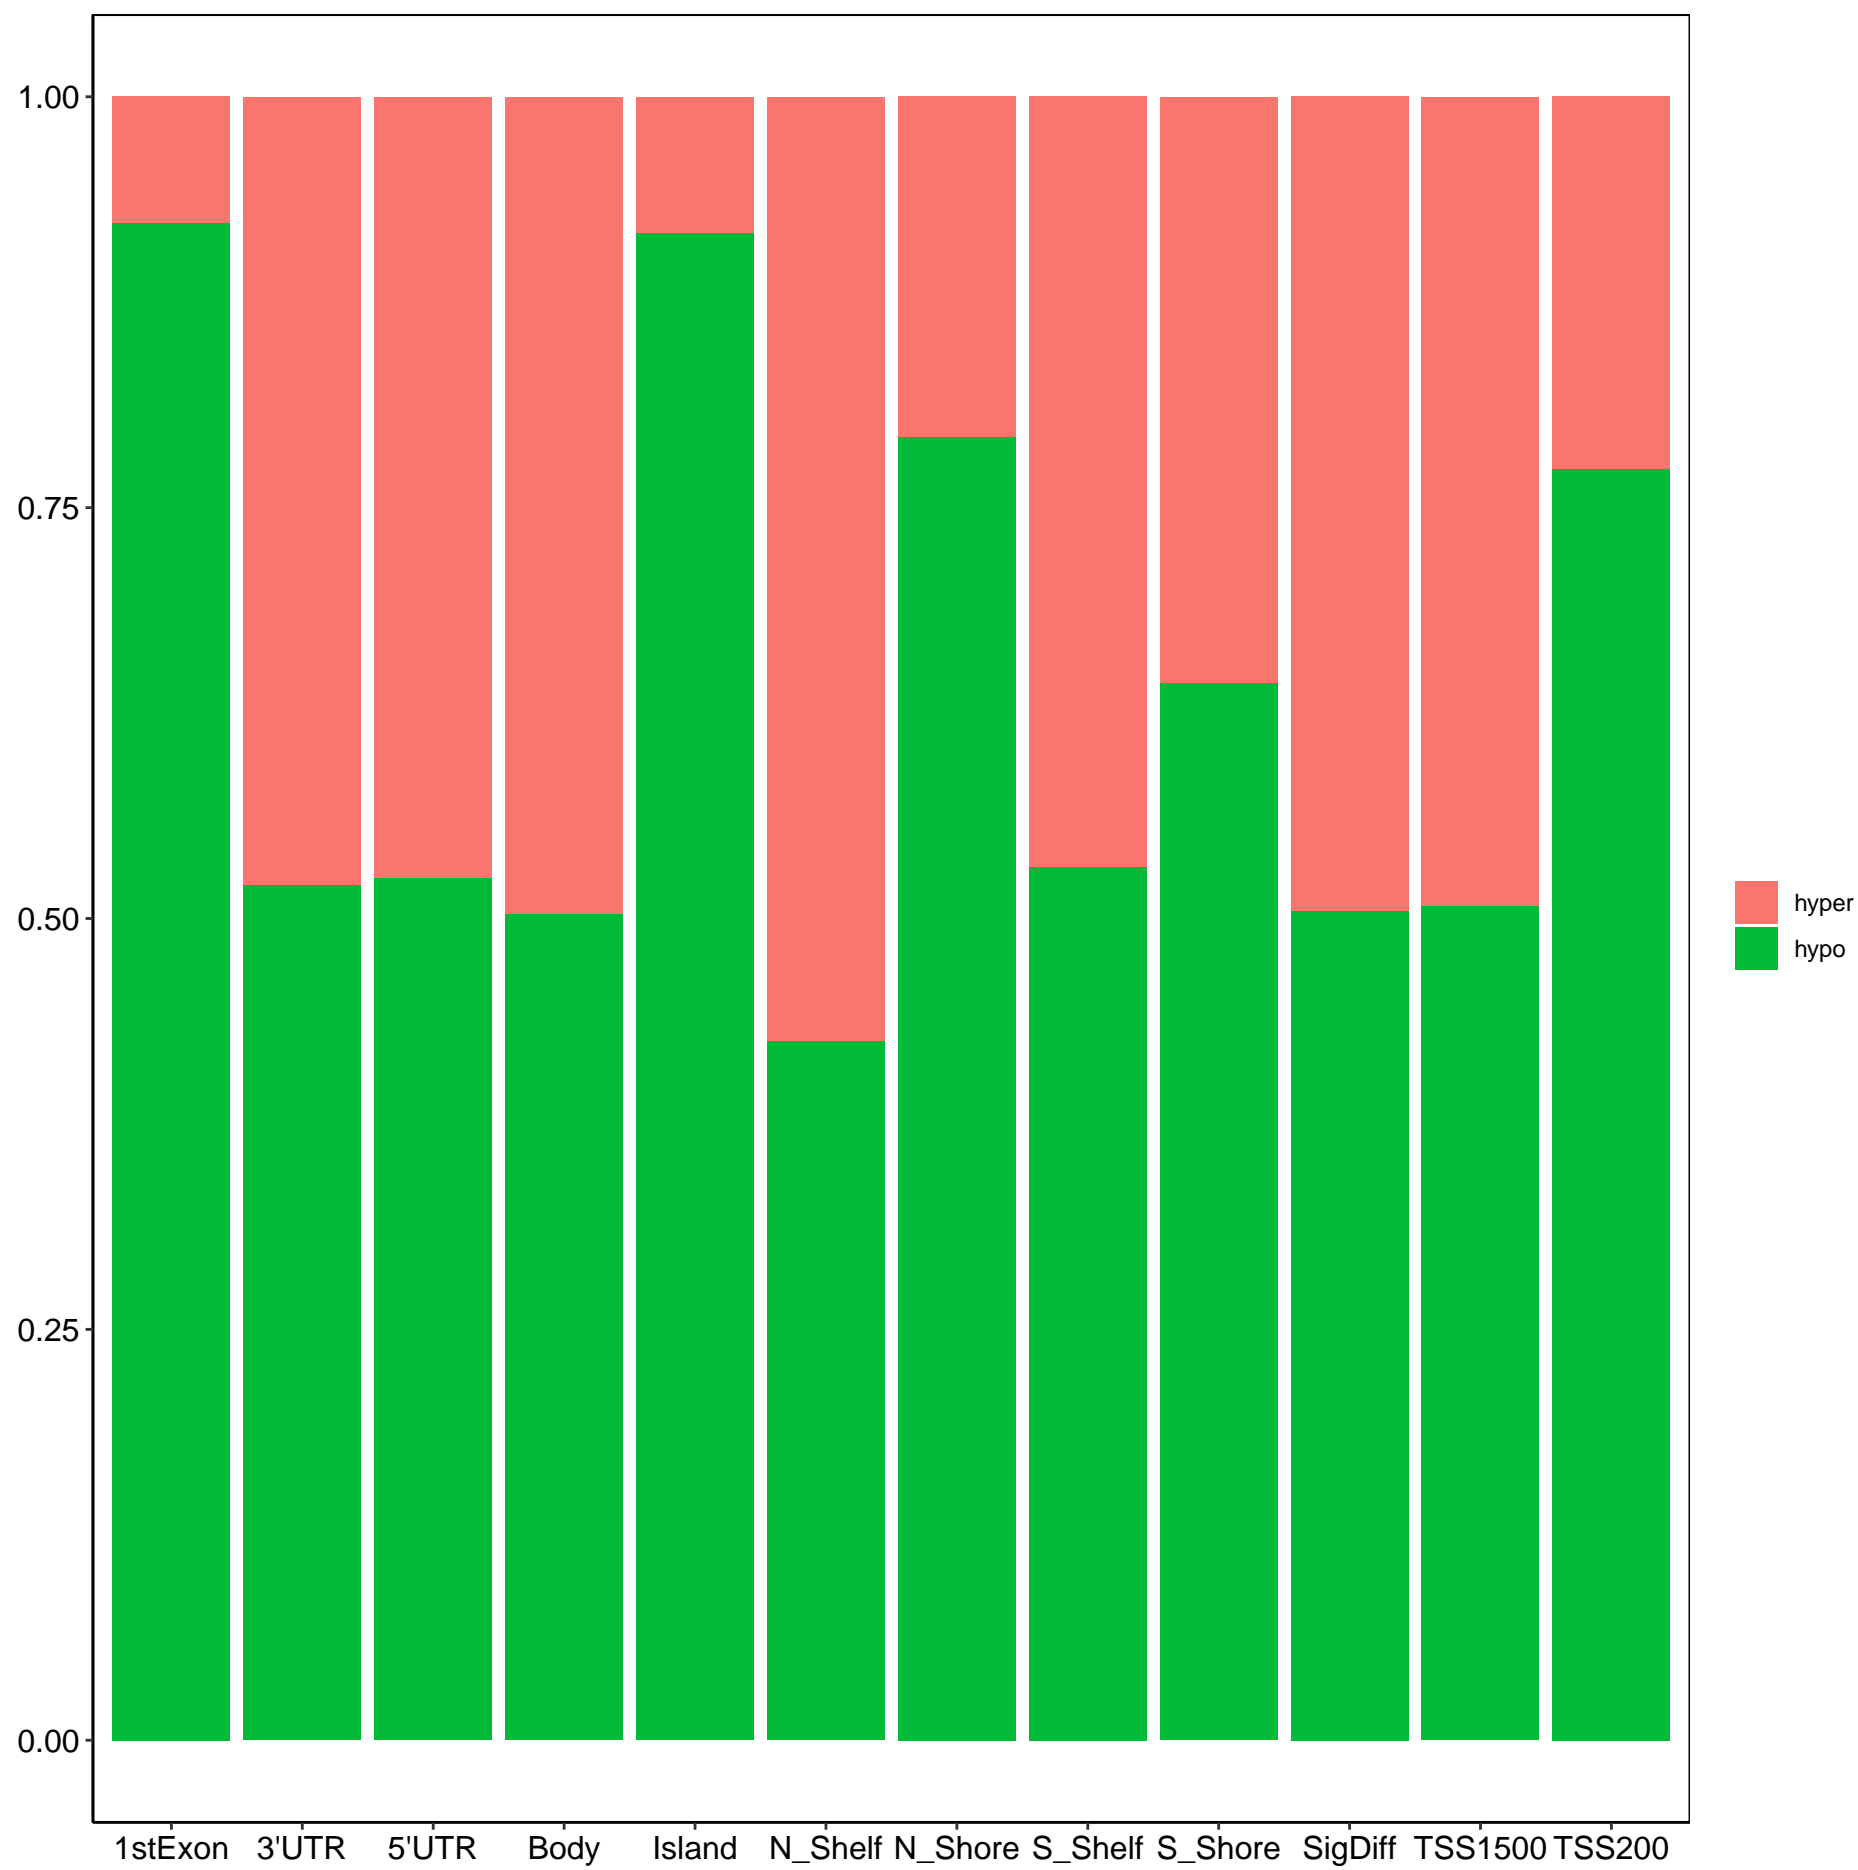

Supplement: f1 [file 9343285.f1.zip]

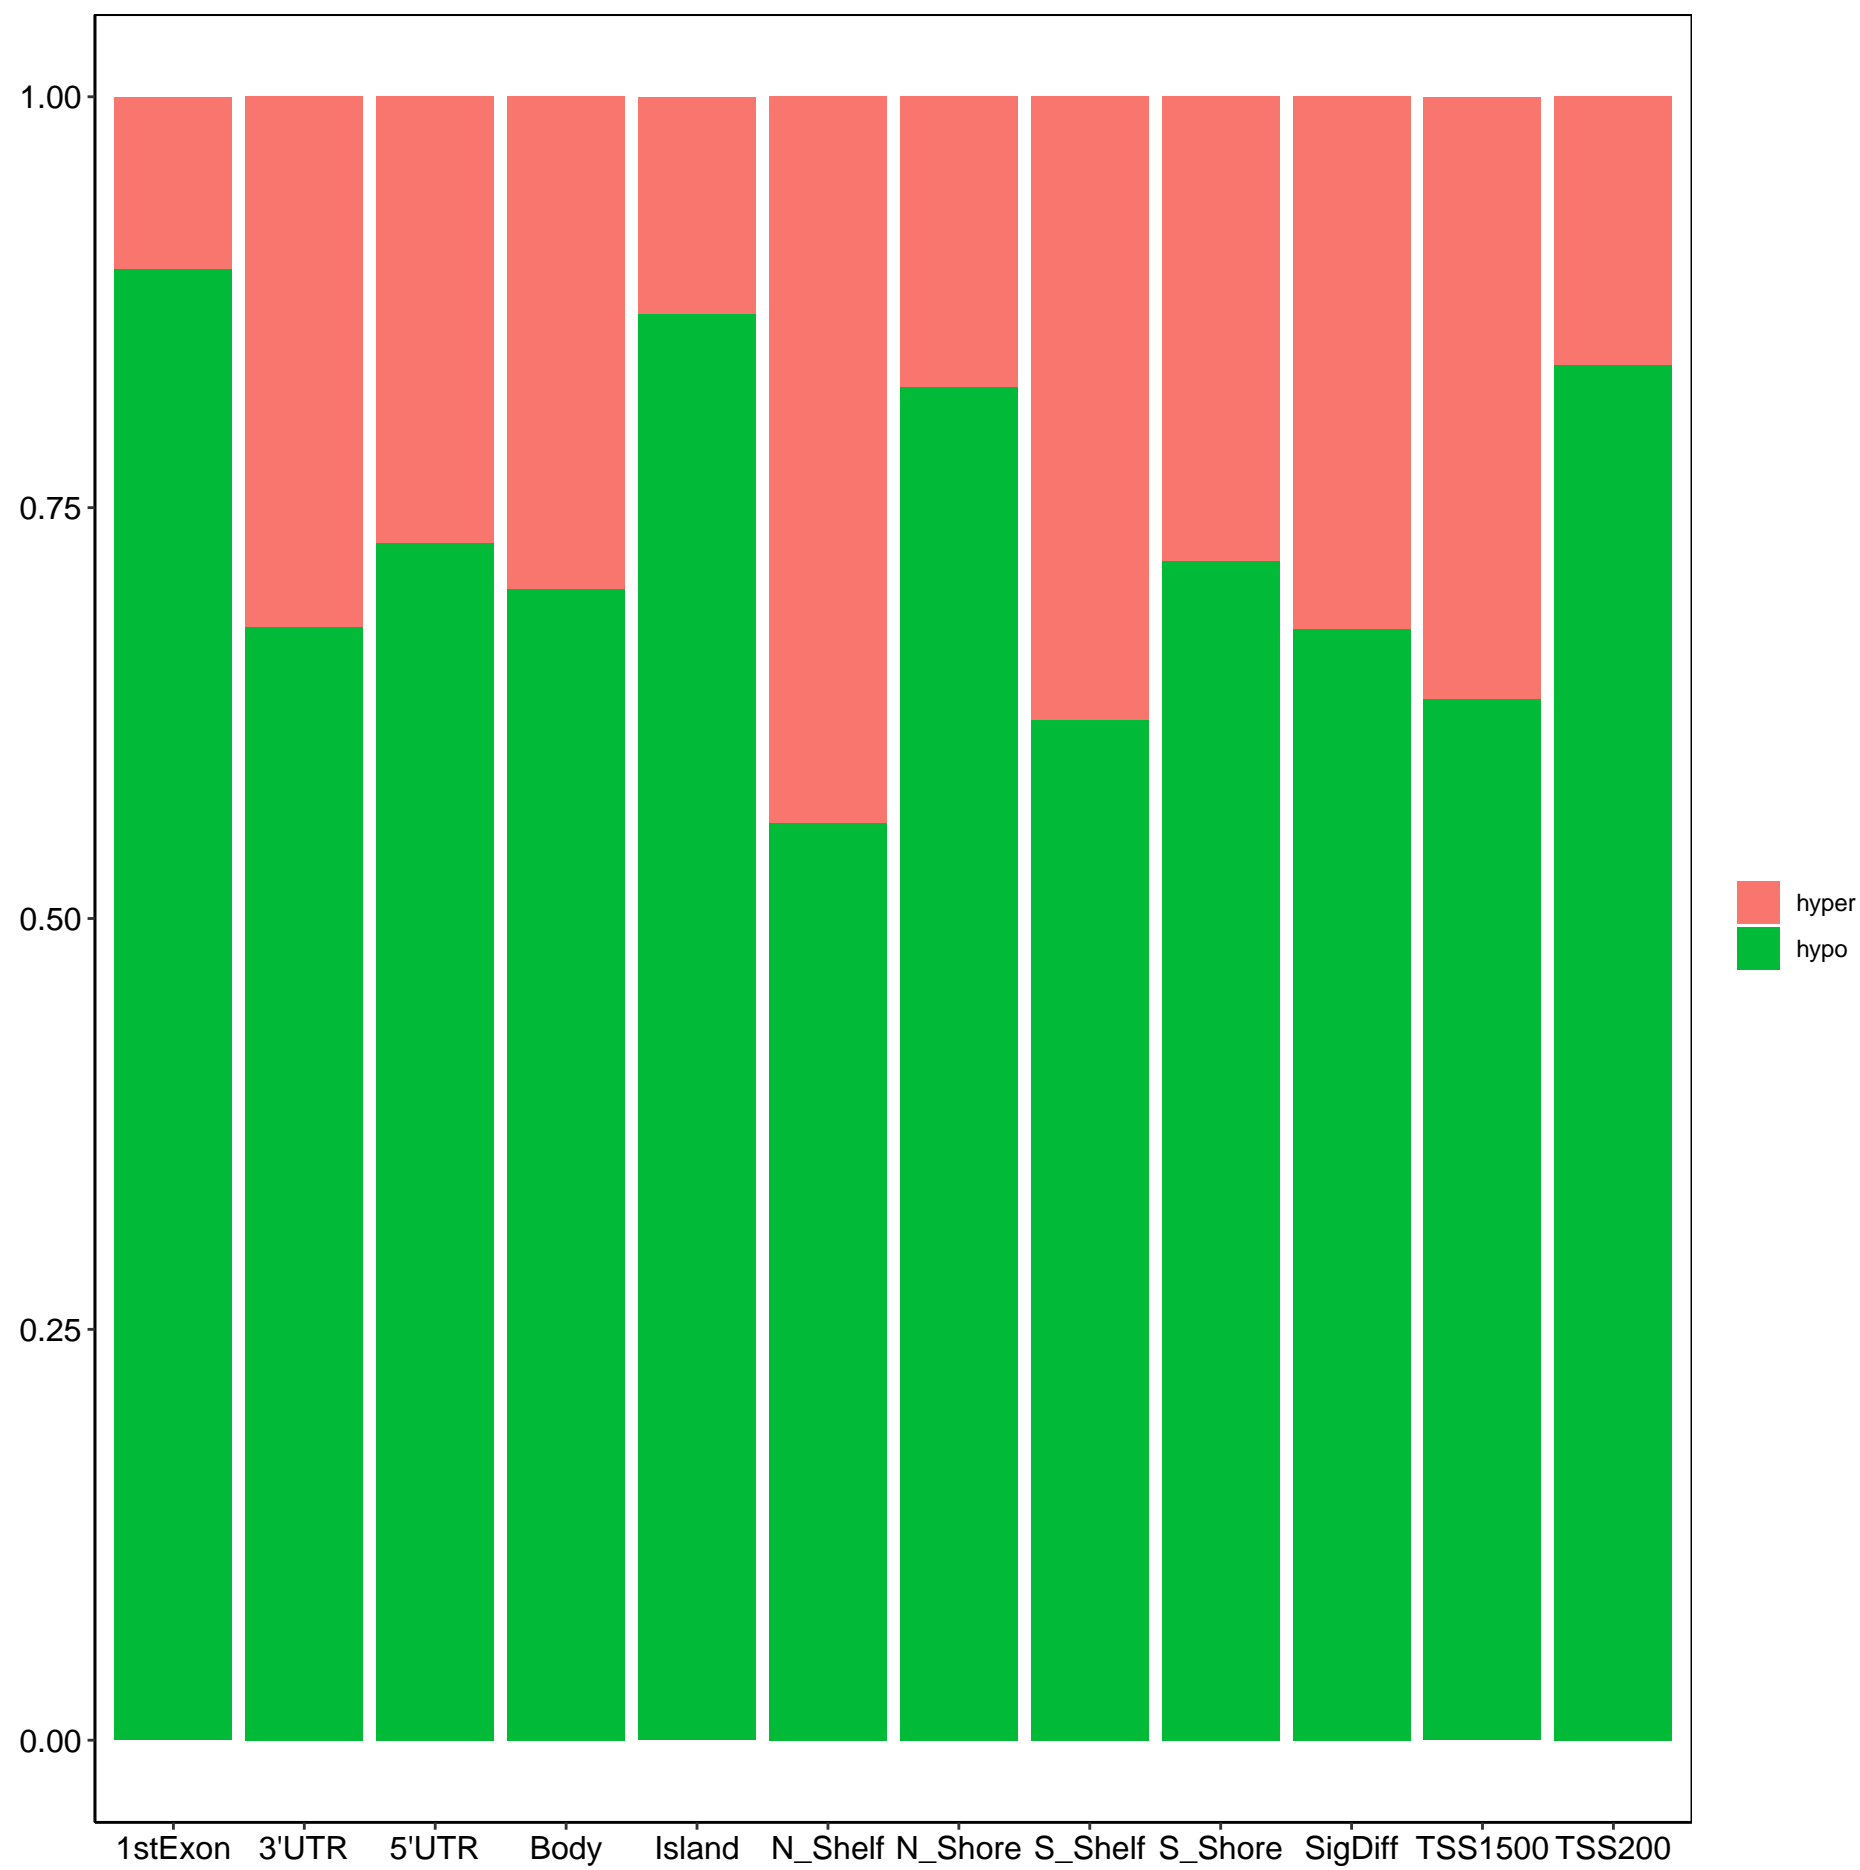

Supplement: f1 [file 9343285.f1.zip]

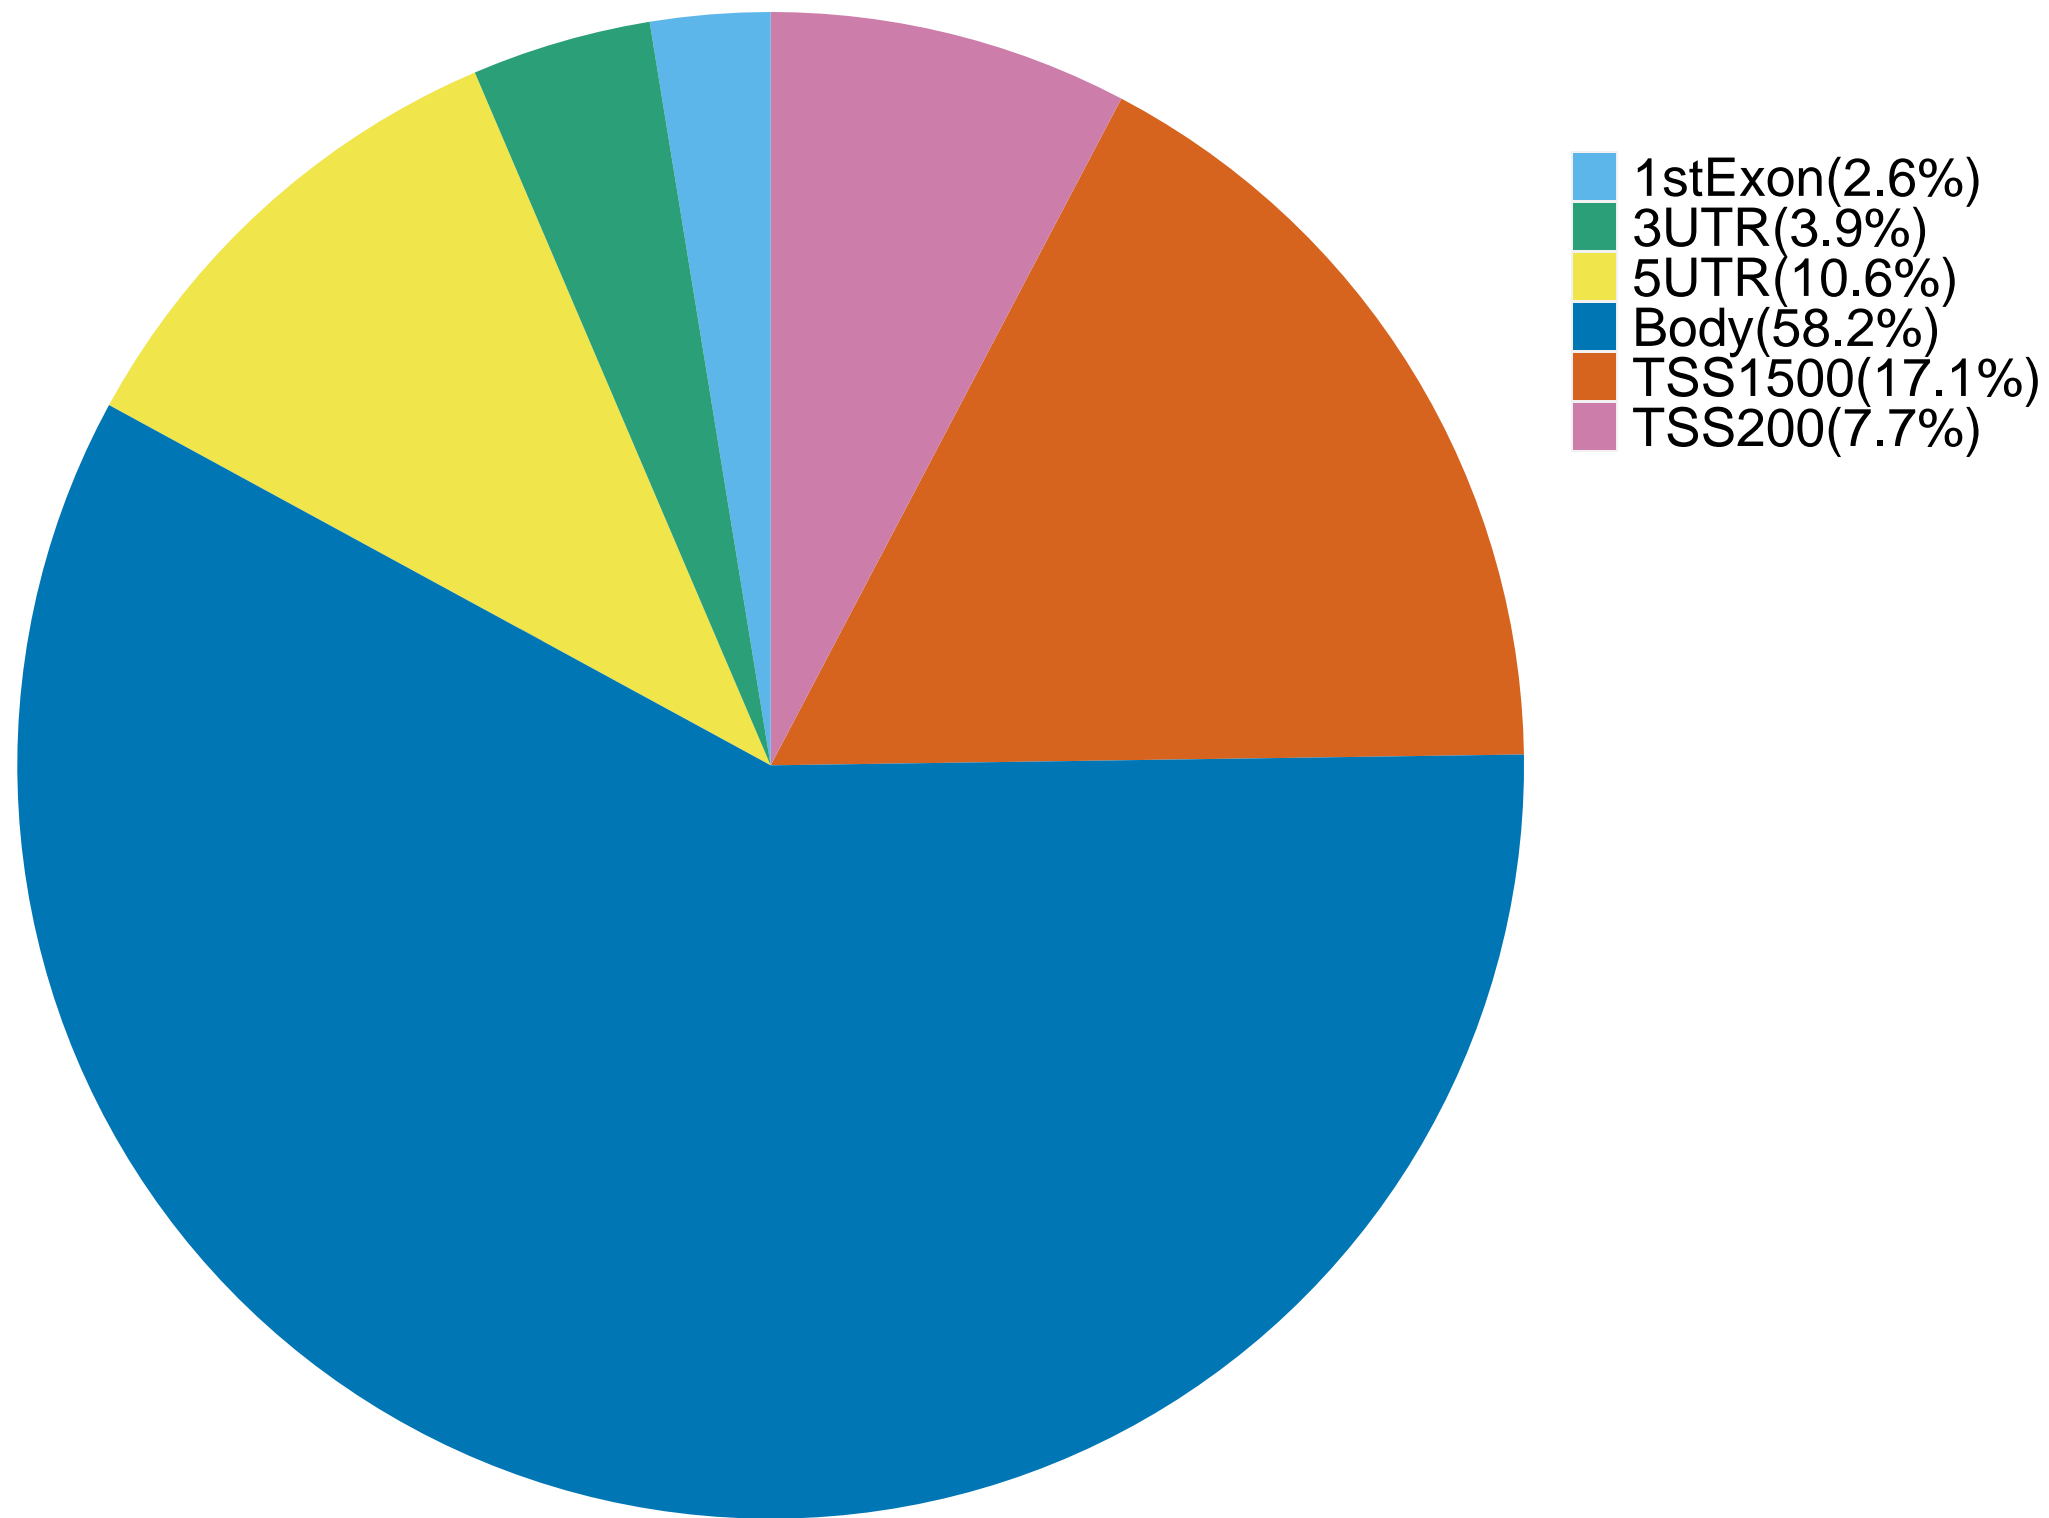

Supplement: f1 [file 9343285.f1.zip]

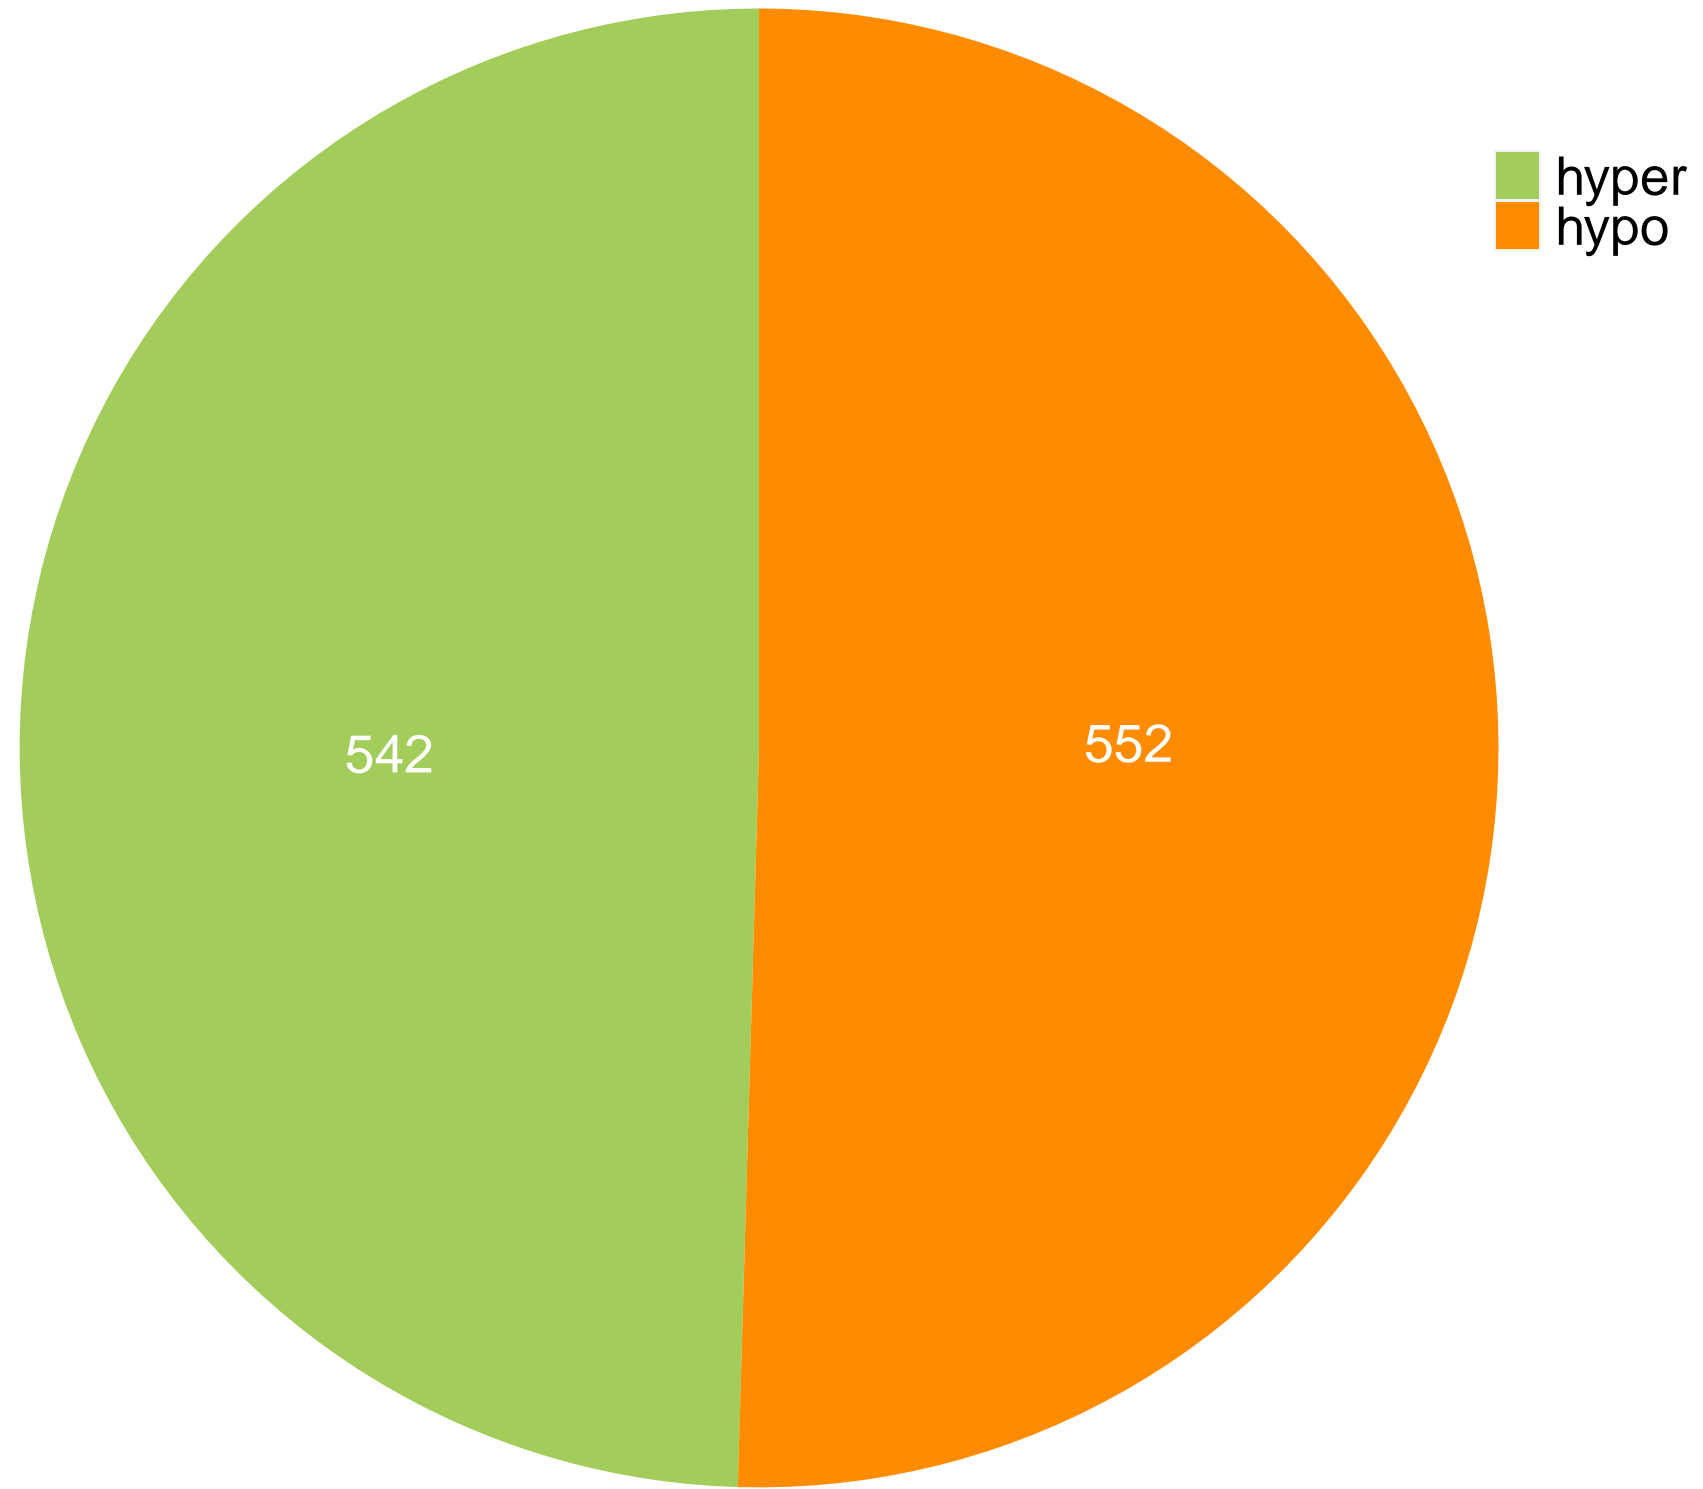

Supplement: f1 [file 9343285.f1.zip]

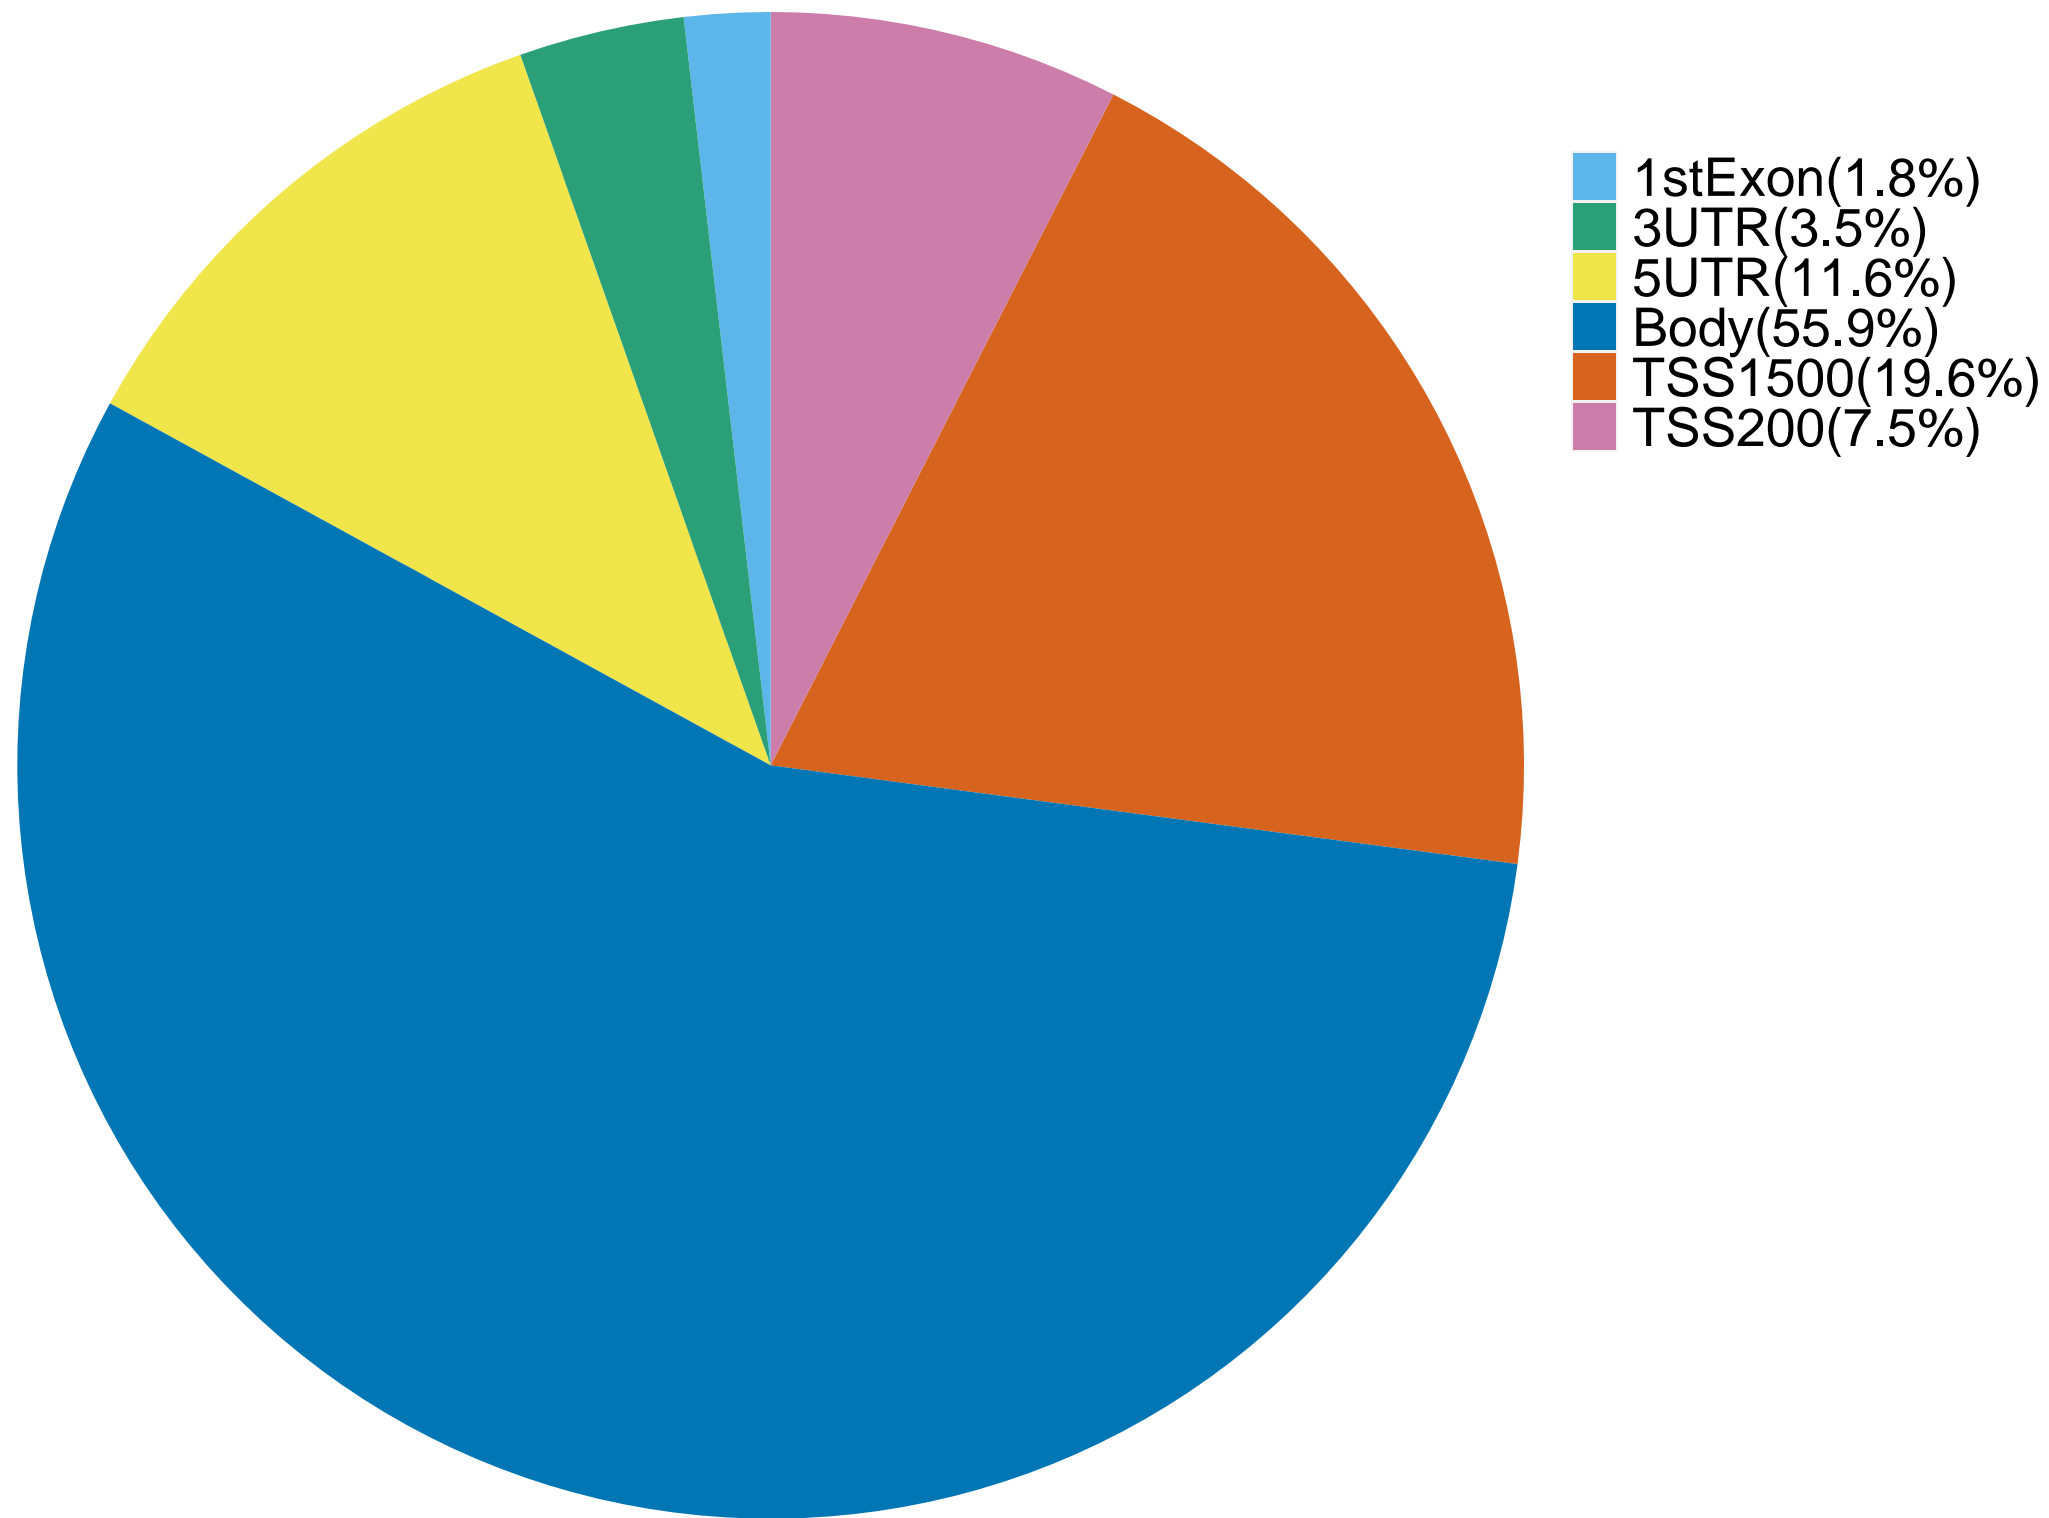

Supplement: f1 [file 9343285.f1.zip]
